# Supplementary material for: Health literacy among pregnant women in a lifestyle intervention trial: protocol for an explorative study on the role of health literacy in the perinatal health service setting
Source: PubMed Central journal article supplement — BMJ Open. 2021 Jul 1;11(7):e047377. doi: 10.1136/bmjopen-2020-047377 (PMC8252873; doi:10.1136/bmjopen-2020-047377), 2021-07-01
Supplement: bmjopen-2020-047377.draft_revisions.pdf [file bmjopen-2020-047377.draft_revisions.pdf]

# BMJ Open

BMJ Open is committed to open peer review. As part of this commitment we make the peer review history of every article we publish publicly available.

When an article is published we post the peer reviewers' comments and the authors' responses online. We also post the versions of the paper that were used during peer review. These are the versions that the peer review comments apply to.

The versions of the paper that follow are the versions that were submitted during the peer review process. They are not the versions of record or the final published versions. They should not be cited or distributed as the published version of this manuscript.

BMJ Open is an open access journal and the full, final, typeset and author-corrected version of record of the manuscript is available on our site with no access controls, subscription charges or pay-per-view fees (<http://bmjopen.bmj.com>).

If you have any questions on BMJ Open's open peer review process please email [info.bmjopen@bmj.com](mailto:info.bmjopen@bmj.com)

# BMJ Open

## Understanding the role of health literacy in the GeMuKi project

|                               |                                                                                                                                                                                                                                                                                                                                                                                                                                                                                                                                                                                                                                                                                                             |
|-------------------------------|-------------------------------------------------------------------------------------------------------------------------------------------------------------------------------------------------------------------------------------------------------------------------------------------------------------------------------------------------------------------------------------------------------------------------------------------------------------------------------------------------------------------------------------------------------------------------------------------------------------------------------------------------------------------------------------------------------------|
| Journal:                      | <i>BMJ Open</i>                                                                                                                                                                                                                                                                                                                                                                                                                                                                                                                                                                                                                                                                                             |
| Manuscript ID                 | bmjopen-2020-047377                                                                                                                                                                                                                                                                                                                                                                                                                                                                                                                                                                                                                                                                                         |
| Article Type:                 | Protocol                                                                                                                                                                                                                                                                                                                                                                                                                                                                                                                                                                                                                                                                                                    |
| Date Submitted by the Author: | 02-Dec-2020                                                                                                                                                                                                                                                                                                                                                                                                                                                                                                                                                                                                                                                                                                 |
| Complete List of Authors:     | Nawabi, Farah; University of Cologne Institute of Health Economics and Clinical Epidemiology,<br>Alayli, Adrienne; University of Cologne Institute of Health Economics and Clinical Epidemiology; Federal Centre for Health Education<br>Krebs, Franziska; University of Cologne Institute of Health Economics and Clinical Epidemiology<br>Lorenz, Laura; University of Cologne Institute of Health Economics and Clinical Epidemiology<br>Shukri, Arim; University of Cologne Institute of Health Economics and Clinical Epidemiology<br>Bau, Anne-Madeleine; Platform Nutrition and Physical Activity<br>Stock, Stephanie; University of Cologne Institute of Health Economics and Clinical Epidemiology |
| Keywords:                     | PUBLIC HEALTH, EDUCATION & TRAINING (see Medical Education & Training), PRIMARY CARE                                                                                                                                                                                                                                                                                                                                                                                                                                                                                                                                                                                                                        |
|                               |                                                                                                                                                                                                                                                                                                                                                                                                                                                                                                                                                                                                                                                                                                             |

SCHOLARONE™  
Manuscripts

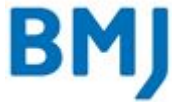

I, the Submitting Author has the right to grant and does grant on behalf of all authors of the Work (as defined in the below author licence), an exclusive licence and/or a non-exclusive licence for contributions from authors who are: i) UK Crown employees; ii) where BMJ has agreed a CC-BY licence shall apply, and/or iii) in accordance with the terms applicable for US Federal Government officers or employees acting as part of their official duties; on a worldwide, perpetual, irrevocable, royalty-free basis to BMJ Publishing Group Ltd ("BMJ") its licensees and where the relevant Journal is co-owned by BMJ to the co-owners of the Journal, to publish the Work in this journal and any other BMJ products and to exploit all rights, as set out in our [licence](#).

The Submitting Author accepts and understands that any supply made under these terms is made by BMJ to the Submitting Author unless you are acting as an employee on behalf of your employer or a postgraduate student of an affiliated institution which is paying any applicable article publishing charge ("APC") for Open Access articles. Where the Submitting Author wishes to make the Work available on an Open Access basis (and intends to pay the relevant APC), the terms of reuse of such Open Access shall be governed by a Creative Commons licence – details of these licences and which [Creative Commons](#) licence will apply to this Work are set out in our licence referred to above.

Other than as permitted in any relevant BMJ Author's Self Archiving Policies, I confirm this Work has not been accepted for publication elsewhere, is not being considered for publication elsewhere and does not duplicate material already published. I confirm all authors consent to publication of this Work and authorise the granting of this licence.

1  
2  
3 **Title** Understanding the role of health literacy in the GeMuKi project  
4  
5

6 **Corresponding Author:**  
7

8  
9 Farah Nawabi, M.Sc.<sup>1</sup> [farah.nawabi@uk-koeln.de](mailto:farah.nawabi@uk-koeln.de) <https://orcid.org/0000-0002-9433-1390>  
10  
11

12 **Postal address:** Institute for Health Economics and Clinical Epidemiology, Gleueler  
13  
14 Straße 176-178, 50935 Cologne, Germany  
15  
16

17  
18 **E-mail:** [farah.nawabi@uk-koeln.de](mailto:farah.nawabi@uk-koeln.de)  
19

20  
21 **Telephone number:** +49 221 478 30917  
22  
23

24 **Co-Authors**  
25

26  
27 Adrienne Alayli, Ph.D.<sup>1,2</sup> [adrienne.alayli@uk-koeln.de](mailto:adrienne.alayli@uk-koeln.de)  
28  
29

30  
31 Franziska Krebs, M.Sc.<sup>1</sup> [franziska.krebs@uk-koeln.de](mailto:franziska.krebs@uk-koeln.de)  
32  
33

34  
35 Laura Lorenz, M.Sc.<sup>1</sup> [laura.lorenz@uk-koeln.de](mailto:laura.lorenz@uk-koeln.de)  
36  
37

38  
39 Arim Shukri, Dipl.–Math.<sup>1</sup> [arim.shukri@uk-koeln.de](mailto:arim.shukri@uk-koeln.de)  
40  
41

42  
43 Dr. Anne-Madeleine Bau<sup>3</sup> [am.bau@pebonline.de](mailto:am.bau@pebonline.de)  
44  
45

46  
47 Prof. Dr. med. Stephanie Stock<sup>1</sup> [stephanie.stock@uk-koeln.de](mailto:stephanie.stock@uk-koeln.de) <https://orcid.org/0000-0002-1726-9300>  
48  
49

50 <sup>1</sup> University of Cologne, Faculty of Medicine and University Hospital Cologne, Institute for  
51 Health Economics and Clinical Epidemiology, University Hospital Cologne, Cologne,  
52 Germany  
53

54 <sup>2</sup> Federal Centre for Health Education (BZgA), Cologne, Germany  
55

56 <sup>3</sup> Platform Nutrition and Physical Activity (peb), Berlin, Germany  
57  
58  
59  
60

## Keywords

Health literacy, lifestyle, behaviour, gestational weight gain, intervention, multi-professional collaboration

Word count: 3.636

## Abstract

**Introduction:** Pregnancy is a vulnerable period that affects long-term health of pregnant women and their unborn infants. Health literacy plays a crucial role in promoting healthy behaviour and thereby maintaining good health. This study explores the role of health literacy in the GeMuKi project. It will assess the ability of the GeMuKi lifestyle intervention to positively affect health literacy levels and explore associations between health literacy, health outcomes, health services use and effectiveness of the intervention.

**Methods and analysis:** The GeMuKi trial has a hybrid effectiveness-implementation design and is carried out in routine prenatal health service settings. Women (n= 1860) are recruited by their gynaecologist during routine check-up visits before 12 weeks of gestation. Healthcare providers carry out counselling using Motivational Interviewing techniques to positively affect health literacy and lifestyle-related risk factors. Healthcare providers (gynaecologist and midwife) and women jointly agree upon SMART goals. Women will be invited to fill in questionnaires at two time points using an App. Health Literacy is measured using the German version of the HLS-EU-16 and the BHLS. Lifestyle is measured with questions on physical activity, nutrition, alcohol and drugs use. Health outcomes of both mother and child, including gestational weight gain (GWG) will be documented at each routine visit. Health service use will be assessed using social health insurance claims data. Data analyses will be conducted using IBM SPSS Statistics. They include descriptive statistics, tests, and regression models. A

1  
2  
3 mediation model will be conducted to answer the question whether health behaviour mediates  
4  
5 the association between health literacy and GWG.  
6  
7

8 **Ethics and dissemination:** The study was approved by the University Hospital of Cologne  
9  
10 Research Ethics committee (ID: 18-163) and the State Chamber of Physicians in Baden-  
11  
12 Wuerttemberg (ID: B-F-2018-100). Study results will be disseminated through (poster)  
13  
14 presentations at conferences and publications in peer-reviewed journals.  
15  
16

### 17 18 **Strengths and limitations of this study**

- 19  
20 • The study contributes to a better understanding of interventions that seek to promote  
21  
22 health literacy
- 23  
24 • The study will provide novel insights on the association between health literacy,  
25  
26 lifestyle, health outcomes and health services use during pregnancy
- 27  
28 • Health literacy will be measured subjectively as well as objectively
- 29  
30 • A comprehensive recruitment strategy, supported by all German statutory health  
31  
32 insurances will contribute to inclusion of pregnant women with different health literacy  
33  
34 levels
- 35  
36 • Women not proficient in German language are not included, which might result in  
37  
38 exclusion of migrants  
39  
40  
41  
42  
43  
44  
45  
46  
47

## 48 **INTRODUCTION**

49 Health literacy describes a persons' ability to access, understand, appraise and apply health  
50  
51 information to make informed decisions regarding their health (1). Inadequate health literacy is  
52  
53 associated with a diversity of negative outcomes such as more hospital visits and medication  
54  
55 use, less utilization of screenings as well as negative health behaviours, such as drug and alcohol  
56  
57  
58  
59  
60

1  
2  
3 use and unhealthy nutrition (2) (3). Accordingly, adequate health literacy is important to  
4  
5 achieve and maintain good health.  
6  
7

8 A representative study from 2014 revealed that more than 50% of the German population has  
9  
10 an inadequate health literacy level (4). As a result, a group of experts from academia, practice  
11  
12 and policy was formed to develop a National Action Plan Health Literacy (NAP) to improve  
13  
14 health literacy in Germany (5) (6). The action plan advocates for addressing health literacy both  
15  
16 early in life and through measures at the healthcare system level, e.g. by facilitating navigation,  
17  
18 creating user-friendly information as well as comprehensible communication between health  
19  
20 professionals and users (5). The action plan points out that measures to strengthen health  
21  
22 literacy should focus on various user groups in the healthcare system, particularly vulnerable  
23  
24 groups.  
25  
26  
27

28  
29  
30 Pregnancy is a vulnerable time in which pregnant women are confronted with a diversity of  
31  
32 changes, not only physically, but also with regards to the responsibilities of being pregnant and  
33  
34 becoming a parent. These changes make women and parents sensible to preventive health  
35  
36 information (7). However, the large quantity and diverse quality of the available information  
37  
38 make it difficult for women to understand and to decide, which information is relevant for them  
39  
40 (8). Studies demonstrate that compared to women with adequate health literacy, women with  
41  
42 inadequate level of health literacy more frequently smoke during pregnancy, do not exclusively  
43  
44 breastfeed their child the first months after birth and do not engage in prenatal care at the  
45  
46 beginning of the pregnancy (9) (10) (11) (12) (13). These lifestyle behaviours are likely to  
47  
48 impact long-term health outcomes of both mother and child. Through a process referred to as  
49  
50 perinatal programming, external factors such as maternal health behaviours influence the foetal  
51  
52 development alongside genetic factors and thereby affect the risk of developing obesity and  
53  
54 chronic diseases (14). For example, a pregnant woman's nutrition and physical activity can  
55  
56 result in excessive gestational weight gain (GWG). GWG is linked to increased pregnancy and  
57  
58  
59  
60

1  
2  
3 birth complications, including the risk for obesity or a chronic condition such as type 2 diabetes  
4 in the offspring (15). Therefore, to reduce these risk factors it seems important that pregnant  
5 women find, understand and apply health information relevant for a healthy lifestyle and GWG  
6 during pregnancy.  
7  
8  
9

10  
11  
12 Research suggests that health literacy sensitive educational interventions promote desirable  
13 health outcomes such as self-care behaviour, particularly physical activity (16). To date  
14 however, little is known about the role of health literacy during the time of pregnancy. Studies  
15 examining the effectiveness of sensitive interventions to promote health literacy in pregnant  
16 women are also lacking. This study seeks to address this gap. It explores the relationship of  
17 health literacy with other variables within the GeMuKi project. The GeMuKi (acronym for  
18 “Gemeinsam Gesund: Vorsorge plus für Mutter und Kind” - Strengthening health promotion:  
19 enhanced check-up visits for mother and child) project examines a novel lifestyle intervention  
20 during pregnancy. The intervention consists of a brief lifestyle intervention implemented during  
21 routine prenatal check-ups in the German state of Baden-Wuerttemberg. The intervention aims  
22 to contribute to a healthy lifestyle and GWG by strengthening health literacy of pregnant  
23 women. Building on the NAP, GeMuKi seeks to strengthen HL through a) involving the  
24 pregnant women actively in the counselling, b) enabling participation when setting joint goals  
25 to improve health behaviour c) making health information understandable in counselling  
26 sessions.  
27  
28  
29  
30  
31  
32  
33  
34  
35  
36  
37  
38  
39  
40  
41  
42  
43  
44  
45  
46  
47

48 For the present study, it is hypothesized that a) health literacy levels are positively affected by  
49 the GeMuKi intervention and that b) health literacy has an impact on further variables,  
50 including health outcomes, health behaviour as well as health service use during pregnancy.  
51  
52

53 The following research questions will be answered:  
54

- 55 1. Can health literacy levels in pregnant women be improved by means of the GeMuKi  
56 lifestyle intervention during regular check-ups?  
57  
58  
59  
60



- 2
  - 3
  - 4
  - 5
  - 6
  - 7
  - 8
  - 9
  - 10
  - 11
  - 12
  - 13
  - 14
  - 15
  - 16
  - 17
  - 18
  - 19
  - 20
  - 21
  - 22
  - 23
  - 24
  - 25
  - 26
  - 27
  - 28
  - 29
  - 30
  - 31
  - 32
  - 33
  - 34
  - 35
  - 36
  - 37
  - 38
  - 39
  - 40
  - 41
  - 42
  - 43
  - 44
  - 45
  - 46
  - 47
  - 48
  - 49
  - 50
  - 51
  - 52
  - 53
  - 54
  - 55
  - 56
  - 57
  - 58
  - 59
  - 60
2. Do health literacy levels affect the effectiveness of the GeMuKi lifestyle intervention as well as health outcomes and health services use during pregnancy?
  3. Is the association between health literacy and weight development during pregnancy mediated by health behaviour?

## METHODS

Data on health literacy, health outcomes and health service use during pregnancy will be collected in the GeMuKi project. The project uses a hybrid effectiveness-implementation design (Type II), to assess effectiveness and implementation of the GeMuKi intervention. The study consists of two arms: the intervention group receives a brief counselling (GeMuKi), while the control group receives regular care. The lifestyle intervention takes place during up to eleven regular check-up visits during pregnancy and the infants' first year. The present study will focus on the period from the first check-up during pregnancy until birth. It will consider only check-ups conducted by gynaecologists and midwives. A detailed description of the general design of the GeMuKi project can be found elsewhere (17). Health literacy is a complex concept that has been insufficiently studied during the time of pregnancy. Therefore, a separate in depth analysis of health literacy related aspects is warranted. This paper particularly focusses on health literacy and addresses research questions that have not been described elsewhere, as they go beyond the evaluation of effectiveness and implementation of the GeMuKi project.

### Study sample

The study sample is recruited in participating gynaecologist practices. Gynaecologists determine the eligibility of pregnant women, using the following inclusion criteria:  $\geq 18$  years old,  $< 12$  weeks of gestation at recruitment, proficient German language skills. Women are not eligible when scoring high on the Edinburgh Postnatal Depression Scale (EPDS), defined as a total score of greater than nine (= probability of a depression) or a score of three (= answering 'yes, very often') on item number 10 "The thought of harming myself has occurred to me".

1  
2  
3 The sample is expected to include a wide range of health literacy levels, since inclusion criteria  
4 are widely defined and different statutory health insurances partake in the project with different  
5 characteristics of the insured people. The inclusion of different insurances that exist in Germany  
6  
7 allow to include women with diverse socio-economic status', migration background and health  
8 status (e.g. smoking behaviour, obesity and cardiovascular disease) (18). Moreover, about 84%  
9  
10 of all pregnant women come for the first check-up before the 13th week of pregnancy; 80%  
11  
12 attend at least 10 preventive examinations during pregnancy (19).  
13  
14  
15  
16  
17  
18  
19

20 A more detailed description of the study sample is provided by Alayli and colleagues (2020)  
21 (17). They estimated 1860 participants to be needed in the study. For the health literacy related  
22 research questions described here, this sample size is considered sufficient. To counteract  
23 cumulating Type 1 errors due to multiple testing, Bonferroni corrections will be made.  
24  
25  
26  
27  
28  
29

### 30 Health literacy strengthening intervention

31 GeMuKi is a multi-professional computer-assisted lifestyle intervention. During pregnancy, the  
32 intervention is carried out by gynaecologists and midwives. It aims at strengthening health  
33 literacy and positively affecting lifestyle-related risk factors in expecting mothers, which also  
34 affect their infants.  
35  
36  
37  
38  
39

#### 40 *Preventive counselling to strengthen health literacy*

41  
42 Health literacy will be strengthened during the counselling sessions by actively involving  
43 pregnant women in the decision making process which lifestyle topic to focus on in the  
44 counselling. Participation is one of the recommendations the NAP suggests to improve health  
45 literacy. The topics of the counselling are based on the national recommendations on a health  
46 promoting lifestyle during pregnancy and after birth from the "Healthy Start – Young Family  
47 Network" (Netzwerk Gesund ins Leben (GiL) (20). The recommendations provide  
48 gynaecologists, midwives, paediatricians and other medical professions with a basis for  
49 counselling a healthy lifestyle (20). The first recommendations from 2012 were updated in  
50  
51  
52  
53  
54  
55  
56  
57  
58  
59  
60

1  
2  
3 2018, adding recommendations for the time before pregnancy and around the conception phase  
4  
5 (20).  
6  
7

8 To strengthen health literacy of the participants, healthcare providers receive training to  
9  
10 communicate key messages from the recommendations by means of Motivational Interviewing  
11  
12 (MI). MI is built upon the notion that people autonomously change their behaviour (21). This  
13  
14 should be considered by the healthcare provider when carrying out the counselling: the  
15  
16 healthcare provider is supposed to actively listen and react with open-ended questions to trigger  
17  
18 behaviour change. It is in line with the NAP, which recommends that health professionals  
19  
20 should communicate sensitive to the health literacy levels of the individual in order to positively  
21  
22 affect their health literacy and thus health behaviour. At the end of each counselling  
23  
24 appointment, the participant along with the support of the healthcare provider will set up  
25  
26 SMART (Specific Measurable Achievable Reasonable Time Bound) goals to positively change  
27  
28 behaviour, which can be accomplished until the next appointment. The SMART goals are  
29  
30 individualised and adapted to the capacities of women. This way, the counselling as well as the  
31  
32 SMART goals are tailored to the health literacy levels of women.  
33  
34  
35  
36  
37  
38

### 39 *Digital intervention component to strengthen health literacy*

40  
41 Digitalisation is used as recommended by the NAP to strengthen health literacy by providing  
42  
43 pregnant women with the GeMuKi-App. The App is used by the participants to 1) receive health  
44  
45 information on pregnancy and 2) receive the SMART goals as push-notifications. The App is  
46  
47 designed in an easy to handle way, which is accessible for women with different health literacy  
48  
49 levels. App usage on mobiles phones is the most appropriate way to reach women, as research  
50  
51 suggests that women with low level of health literacy rather use mobile phones than email  
52  
53 communication or the internet (22). For purposes of the evaluation study, the App is also used  
54  
55 by pregnant women to fill in questionnaires.  
56  
57  
58  
59  
60

Healthcare providers enter results from the maternity check-ups into the maternity and child medical record booklets. These data, along with GWG and the chosen lifestyle topic are entered into the GeMuKi-Assist counselling tool. The tool is a component of the telehealth platform GeMuKi-Assist, which was particularly developed for the healthcare providers. The counselling tool also provides supporting questions that healthcare providers can ask during the counselling, which are built upon the tenets of MI. In this platform, healthcare providers document the SMART goals during each counselling, which later will be displayed in the women's App. Via the counselling tool, the gynaecologist and midwife of a particular woman have access to the chosen lifestyle topics, goals and medical record booklet data to ensure continuity of the counselling.

## Variables

Table 1 provides a summary of the variables that will be used in the data analysis. Data will be derived from various data sources collected in the GeMuKi project: weight, data from the maternity record booklet and child medical record booklet are entered by healthcare providers in the GeMuKi-Assist counselling tool. The App for women entails questionnaires that women fill in at two time points during pregnancy (Figure 1). Participating health insurances provide health insurance claims data.

*Table 1 Variables and data sources*

| Variable                                 | Data source                                                          | Measures                                                  |
|------------------------------------------|----------------------------------------------------------------------|-----------------------------------------------------------|
| Participant characteristics              | Paper based questionnaire                                            | Age, weight, height (also from the child's father)        |
| Health literacy                          | Questionnaires filled in, in the App                                 | HLS-EU-16*, BHLS**, knowledge based questions             |
| Maternal health outcomes (including GWG) | Maternity record booklet data, entered into the counselling tool     | Health data such as weight, gestational diabetes mellitus |
| Foetal and neonatal health outcomes      | Child medical record booklet data, entered into the counselling tool | Health data such as large for gestational age             |
| Maternal health behaviour                | Questionnaires filled in, in the App                                 | PPAQ***, FFQ****, alcohol and smoking                     |

|                     |                              |                                                                            |
|---------------------|------------------------------|----------------------------------------------------------------------------|
| Health services use | Health insurance claims data | In and outpatient treatment, medication use, aids and remedies, sick leave |
|---------------------|------------------------------|----------------------------------------------------------------------------|

\*HLS-EU-16 (*Health Literacy Survey 16 items*); \*\*B HLS (*Brief Health Literacy Screener*); \*\*\*PPAQ (*Pregnancy Physical Activity Questionnaire*); \*\*\*\*FFQ (*Food Frequency Questionnaire*)

### *Participant characteristics*

Demographic information and anthropometric data (such as height and length) to characterize the sample will be derived from a paper-based questionnaire handed out at baseline in the GeMuKi project (before the 12<sup>th</sup> week of gestation; Figure 1) of both pregnant women and the infant's father. These data will give information on the BMI of the parents, which later will be included in the analysis (17).

<Please insert figure 1 here with the legend: Figure 1 Overview of counselling sessions and time points of data collection>

### *Health Literacy*

Health literacy is assessed using different instruments: the Health Literacy Survey (HLS-EU-16) will be utilized at baseline, to assess a detailed description of the general health literacy levels of pregnant women. When applied in the German general population it has shown a high internal consistency (Cronbach's Alpha of 0.90) (23). Questions can be answered on a 5-point Likert Scale ('very difficult' – 'very easy'; 'I don't know'). Since the HLS-EU-16 also includes questions on illness, these questions may not be suitable for our study population as we cannot assume that all pregnant women have some kind of illness and pregnancy cannot be translated into illness. Therefore, we have supplemented the regular 16 item HLS-EU-16 with two further questions, which particularly aim at the pregnancy ("How easy would you say it is to find information on your pregnancy?" and "How easy would you say it is to use information the doctor gives you to make decisions about your pregnancy?"). Since paper-based questionnaires provide the option to not tick an answer and skip questions, for all questions the additional

1  
2  
3 response category 'I do not want to answer this question' is included in the App based survey.  
4  
5 To assess change in health literacy as a result of the GeMuKi intervention, the Brief Health  
6 Literacy Screener (BHLS) will be used at both time points (t0 and t1). The tool screens for  
7  
8 inadequate health literacy using three questions, which can be answered on a 5-point Likert  
9  
10 Scale ('never' – 'always' and additionally 'I do not want to answer this question'). Other studies  
11  
12 demonstrated high internal consistency for this instrument with a Cronbach's Alpha of 0.80  
13  
14 among hospital patients (24). Modification of health literacy levels will be observed by  
15  
16 assessing changes in the proportion of study participants with inadequate health literacy  
17  
18 between the beginning and end of pregnancy.  
19  
20  
21  
22  
23  
24  
25

### 26 *Knowledge-based health literacy*

27  
28 In addition to the above described measures, which provide subjective estimates of health  
29  
30 literacy, an objective measure of health literacy was developed, consisting of knowledge-based  
31  
32 questions. Knowledge-based questionnaires can be used to assess health literacy because  
33  
34 knowledge acts as a proxy for health literacy (25). Each question was developed based on the  
35  
36 topics of the national recommendations discussed during counselling. They cover the following  
37  
38 topics: weight development, nutrition, alcohol and drug use, physical activity, water intake and  
39  
40 breastfeeding. The questionnaire was developed by researchers of the project with the support  
41  
42 of nutritionists that work in the project. Answers can be given on a 'yes/no/I don't know' scale.  
43  
44  
45  
46 The questionnaire will be statistically analysed calculating frequencies of correct answers.  
47  
48  
49  
50

### 51 *Maternal health outcomes*

52  
53 During every routine prenatal visit, practice assistants enter data from the maternity record  
54  
55 booklet into the GeMuKi-Assist counselling tool. To evaluate maternal health outcomes one  
56  
57 composite measure will be used, derived from the following variables: pre-eclampsia or  
58  
59 pregnancy-induced hypertension, gestational diabetes mellitus (GDM), caesarean section, and  
60

preterm delivery. This measure has been proposed in a Delphi study on the evaluation of lifestyle interventions during pregnancy (26).

#### *Foetal and neonatal health outcomes*

Health data of the child will be recorded at birth in the child medical record booklet. It entails amongst others the following variables: small for gestational age and large for gestational age.

#### *Maternal health behaviour*

Physical activity will be measured using the Pregnancy Physical Activity Questionnaire (PPAQ). This instrument assesses the duration, frequency and intensity of physical activity in pregnant women. It has been used internationally and exhibits Cronbach's alphas above the threshold of 0.70 (27) (28). Nutrition will be assessed using an adjusted version of the Food Frequency Questionnaire (FFQ) from the German Health Examination Survey for Adults (DEGS) (29). This instrument evaluates the frequency of consumption of food groups. Alcohol and smoking is assessed using questions from the German Health Interview and Examination Survey for Children and Adolescents (KIGGS) (30).

#### *GWG*

Maternal weight is documented in every pregnancy check-up visit using the maternity record booklet and entered into the telehealth platform GeMuKi-Assist. In this study, the recommended range of GWG is defined according to the Health and Medicine Division of the National Academies of Science, Engineering and Medicine (NAM) (31). The recommendations are based on prenatal BMI and are displayed in Table 2.

*Table 2 Weight gain recommendations adjusted by BMI*

| <b>Weight</b> | <b>BMI (kg/m<sup>2</sup>)</b> | <b>Recommended weight gain (range in kg)</b> |
|---------------|-------------------------------|----------------------------------------------|
|---------------|-------------------------------|----------------------------------------------|

|               |           |         |
|---------------|-----------|---------|
| Underweight   | <18.5     | 12.5-18 |
| Normal weight | 18.5-24.9 | 11.5-16 |
| Overweight    | 25.0-29.9 | 7-11.5  |
| Obese         | ≥ 30.0    | 5-9     |

Weight gain above the recommendation is classified as excessive weight gain. These recommendations were recently confirmed by 25 pooled cohort studies (32).

### *Health services use*

Data on health services use will be based on health insurance claims and delivered by the participating health insurers. These data are pseudonymised and entail data on in- and outpatient treatment (diagnosis, duration of hospital stay and costs), medication use (pharmaceuticals, amount and costs), aids and remedies (duration of service and costs), and sick leave periods (duration of sick leave and sick pay) (33).

### Data analysis

Plausibility checks of the data will be performed continuously during data collection and before data analysis. Multiple imputation methods will be used to deal with missing values. Descriptive statistics will be used to analyse participant characteristics, such as age and BMI at baseline. Correlations will be calculated to examine whether health literacy levels vary depending on BMI, health outcomes, socioeconomic status and migration background. Differences in the means will be calculated to answer whether the intervention improved health literacy levels in pregnant women. Health literacy change will be analysed comparing the proportion of women with inadequate health literacy at baseline and end of pregnancy. Regression analysis will be utilized to answer the question whether health literacy levels influence the effectiveness of GeMuKi as well as maternal and foetal health outcomes and health services use. A mediation analysis will be conducted to answer the question whether health behaviour (mediator) mediates the association between health literacy (independent variable) and GWG (dependent variable) (Figure 2).



<Please insert figure 2 here with the legend: Figure 2 Mediation Model>

## Patient and Public Involvement

Within the frame of the GeMuKi project, a process evaluation will be conducted, including interviews with participating pregnant women. The interviews aim to answer questions on hindering and supporting factors of the intervention. The overall results of the GeMuKi project will be made available to all participants at the end of the project period.

## ETHICS AND DISSEMINATION

The GeMuKi project was approved by the University Hospital of Cologne Research Ethics committee (ID: 18-163) and the State Chamber of Physicians in Baden-Wuerttemberg (ID: B-F-2018-100). Inference to study participants is not possible since the collected data is pseudonymised in accordance with the EU General Data Protection Regulation (GDPR). Written informed consent will be obtained from all study participants at baseline. Participants are reassured that they are free to withdraw from the study at any time during the study without consequences. Study results will be disseminated through (poster) presentation at conferences and publications in peer-reviewed journals. A closing event is planned with stakeholders involved in the project in which first result of the study will be presented.

## DISCUSSION AND CONCLUSION

To date there is little research on health literacy in pregnant women and interventions to improve health literacy in this population. Even though pregnant women are confronted with a variety of health information during pregnancy, it is difficult to differentiate between the quality of information and which one is important (8). Studies on health literacy in pregnant women are scarce and if they exist, they do not evaluate the change of health literacy as a result of an

1  
2  
3 intervention. To our knowledge, this is the first study assessing the impact of an intervention  
4 that aims at improving health literacy in pregnant women and the influence of health literacy  
5 on various outcomes during pregnancy, such as GWG, lifestyle and health service use. It is  
6 hypothesised that health literacy is increased by a lifestyle intervention that is health literacy  
7 sensitive.  
8  
9

10  
11  
12  
13  
14  
15 Pregnancy offers an important phase, in which the health literacy level of the expecting mother  
16 is not only relevant for her own health but also for the (unborn) infant. This study is set up at  
17 the very beginning of the pregnancy to explore the impact of health literacy on the health of  
18 both mother and child. The GeMuKi project evaluates a low-threshold lifestyle intervention  
19 that is accessible for all pregnant women as it is provided in the regular check-ups during  
20 pregnancy. Previous research supports that low-threshold interventions are easy accessible for  
21 women with both high and low health literacy levels and lead to successful implementation of  
22 an intervention (34). The intervention consists of brief counselling sessions conducted by means  
23 of MI, a technique with which the healthcare provider can tailor the counselling to the health  
24 literacy levels of the pregnant woman. MI techniques also allow the women to partake actively  
25 in the counselling sessions. Research suggests that MI is effective in promoting and positively  
26 changing health behaviour (35). To be health literacy sensitive, the intervention makes use of  
27 digitalisation. Each counselling session is concluded with a SMART goal, defined by both the  
28 healthcare provider and the woman and recorded in the counselling tool, which will then be  
29 displayed in the GeMuKi-App of the pregnant woman. The App also provides further  
30 information on topics that pregnant women might concern and are easily accessible. Using  
31 digitalisation to promote health literacy has been part of other studies and is proven to be  
32 effective (34).  
33  
34  
35  
36  
37  
38  
39  
40  
41  
42  
43  
44  
45  
46  
47  
48  
49  
50  
51  
52  
53  
54  
55

56  
57 An advantage of this study is that we will answer questions that arise with regards to health  
58 literacy in pregnant women. Studies to date have measured health literacy in pregnant women,  
59  
60

1  
2  
3 however it was only one of many secondary outcome variables (36) (37) (38) (39) (40). To  
4 better understand the association between health literacy of pregnant women and (health)  
5 outcomes in both mother and child, we utilize different data using questionnaires, data entry  
6 from the healthcare provider and health insurance data of participants. Additionally, health  
7 literacy is measured using different instruments. The HLS-EU-16 is tailored to the study  
8 participant's situation by adding questions regarding pregnancy. The BHLS is used at the  
9 beginning and end of the pregnancy to assess for changes in the health literacy levels.  
10 Knowledge-based health literacy questions were developed to assess objectively whether  
11 women understand health information on lifestyle during pregnancy and answer these questions  
12 correctly.  
13  
14

15 However, some limitations have to be taken into consideration with regards to this study.  
16 Associations between health literacy and other variables are examined within the GeMuKi  
17 project. Hence, we cannot conclude that the results can be generalised to other interventions.  
18 Additionally, the implementation of the counselling is not monitored, which is why it is not  
19 guaranteed that healthcare providers follow the principles of promoting health literacy and  
20 implement what was taught in the training. Even with the inclusion of different health  
21 insurances, pregnant women with insufficient German language skills will not be eligible for  
22 the study, which rules out an important group that most likely require health literacy  
23 strengthening.  
24  
25

26 Results of this study can contribute to the better understanding of health literacy on various  
27 outcomes and health services use, particularly during pregnancy. Study findings can provide  
28 insights for researchers and policy makers, who want to develop and fund health literacy  
29 sensitive interventions starting during pregnancy.  
30  
31

### 32 **Author's contribution**

1  
2  
3 FN, AA and SS developed the study protocol. FK, LL, AS are members of the research team,  
4 contributed to the design of the study, and provided continuous feedback. AMB is the  
5 coordinator of the GeMuKi consortium, who also provided feedback. FN wrote the manuscript.  
6  
7

8 All authors provided comments and approved the final manuscript.  
9

### 10 11 12 **Funding**

13 This study is funded by the Innovation Fund of the Federal Joint Committee (G-BA) from  
14 10/2017 - 9/2021 in the section "New forms of care", module 3: Improving communication with  
15 patients and promoting health literacy (Project no. 01NVF17014).  
16  
17  
18  
19

### 20 21 22 **Competing interests**

23 The authors declare that they have no competing interests.  
24  
25

### 26 27 28 **Acknowledgements**

29 The authors would like to thank the GeMuKi consortium: Platform Nutrition and Physical  
30 Activity (peb), Institute of Health Economics and Clinical Epidemiology, University Hospital  
31 of Cologne (IGKE), Fraunhofer Institute for Open Communication Systems (FOKUS),  
32 BARMER and Association of Statutory Health Insurance Physicians (KVBW). We would like  
33 to acknowledge in particular Michael John and his team, who developed the telehealth platform  
34 GeMuKi-Assist, used for data collection. We would also like to thank the health insurances that  
35 provide health insurance claims data. Moreover, we would like to thank Isabel Lück and Judith  
36 Kuchenbecker for the input in developing the knowledge-based health literacy questions.  
37  
38  
39  
40  
41  
42  
43  
44  
45  
46  
47  
48  
49  
50  
51  
52  
53  
54

- 55 1. Sorensen K, Van den Broucke S, Fullam J, Doyle G, Pelikan J, Slonska Z, et al. Health literacy  
56 and public health: a systematic review and integration of definitions and models. BMC public health.  
57 2012 Jan 25;12:80. PubMed PMID: 22276600. Pubmed Central PMCID: 3292515.
- 58 2. Berkman ND, Sheridan SL, Donahue KE, Halpern DJ, Crotty K. Low health literacy and health  
59 outcomes: an updated systematic review. Annals of internal medicine. 2011 Jul 19;155(2):97-107.  
60 PubMed PMID: 21768583.

3. Aaby A, Friis K, Christensen B, Rowlands G, Maindal HT. Health literacy is associated with health behaviour and self-reported health: A large population-based study in individuals with cardiovascular disease. *European journal of preventive cardiology*. 2017 Nov;24(17):1880-8. PubMed PMID: 28854822. Pubmed Central PMCID: 5680908.
4. Schaeffer D, Berens EM, Vogt D. Health Literacy in the German Population. *Deutsches Arzteblatt international*. 2017 Jan 27;114(4):53-60. PubMed PMID: 28211318. Pubmed Central PMCID: 5319379.
5. Schaeffer D, Hurrelmann K, Bauer U, Kolpatzik K, Gille S, Vogt D. [National Action Plan Health Literacy: Need, Objective and Content]. *Gesundheitswesen*. 2019 Jun;81(6):465-70. PubMed PMID: 30273942. Der Nationale Aktionsplan Gesundheitskompetenz - Notwendigkeit, Ziel und Inhalt.
6. Schaeffer D, Gille S, Hurrelmann K. Implementation of the National Action Plan Health Literacy in Germany-Lessons Learned. *International journal of environmental research and public health*. 2020 Jun 19;17(12). PubMed PMID: 32575425. Pubmed Central PMCID: 7345560.
7. Briscoe L, Lavender T, McGowan L. A concept analysis of women's vulnerability during pregnancy, birth and the postnatal period. *Journal of advanced nursing*. 2016 Oct;72(10):2330-45. PubMed PMID: 27255232.
8. Sayakhot P, Carolan-Olah M. Internet use by pregnant women seeking pregnancy-related information: a systematic review. *BMC pregnancy and childbirth*. 2016 Mar 28;16:65. PubMed PMID: 27021727. Pubmed Central PMCID: 4810511.
9. Smedberg J, Lupattelli A, Mardby AC, Nordeng H. Characteristics of women who continue smoking during pregnancy: a cross-sectional study of pregnant women and new mothers in 15 European countries. *BMC pregnancy and childbirth*. 2014 Jun 25;14:213. PubMed PMID: 24964728. Pubmed Central PMCID: 4080751.
10. Kaufman H, Skipper B, Small L, Terry T, McGrew M. Effect of literacy on breast-feeding outcomes. *Southern medical journal*. 2001 Mar;94(3):293-6. PubMed PMID: 11284516.
11. Lupattelli A, Picinardi M, Einarson A, Nordeng H. Health literacy and its association with perception of teratogenic risks and health behavior during pregnancy. *Patient education and counseling*. 2014 Aug;96(2):171-8. PubMed PMID: 24862909.
12. Poorman E, Gazmararian J, Elon L, Parker R. Is health literacy related to health behaviors and cell phone usage patterns among the text4baby target population? *Archives of public health = Archives belges de sante publique*. 2014;72(1):13. PubMed PMID: 24872883. Pubmed Central PMCID: 4036492.
13. Endres LK, Sharp LK, Haney E, Dooley SL. Health literacy and pregnancy preparedness in pregestational diabetes. *Diabetes care*. 2004 Feb;27(2):331-4. PubMed PMID: 14747209.
14. Pico C, Palou A. Perinatal programming of obesity: an introduction to the topic. *Frontiers in physiology*. 2013;4:255. PubMed PMID: 24062695. Pubmed Central PMCID: 3775463.
15. Freeman DJ. Effects of maternal obesity on fetal growth and body composition: implications for programming and future health. *Seminars in fetal & neonatal medicine*. 2010 Apr;15(2):113-8. PubMed PMID: 19853544.
16. Osborn CY, Paasche-Orlow MK, Bailey SC, Wolf MS. The mechanisms linking health literacy to behavior and health status. *American journal of health behavior*. 2011 Jan-Feb;35(1):118-28. PubMed PMID: 20950164. Pubmed Central PMCID: 3085858.
17. Alayli A, Krebs F, Lorenz L, Nawabi F, Bau AM, Luck I, et al. Evaluation of a computer-assisted multi-professional intervention to address lifestyle-related risk factors for overweight and obesity in expecting mothers and their infants: protocol for an effectiveness-implementation hybrid study. *BMC public health*. 2020 Apr 15;20(1):482. PubMed PMID: 32293391. Pubmed Central PMCID: 7158079.
18. Hoffmann F, Koller D. [Different Regions, Differently Insured Populations? Socio-demographic and Health-related Differences Between Insurance Funds]. *Gesundheitswesen*. 2017 Jan;79(1):e1-e9. PubMed PMID: 26492391. Verschiedene Regionen, verschiedene Versichertenpopulationen? Soziodemografische und gesundheitsbezogene Unterschiede zwischen Krankenkassen.
19. Koch-Institut R. Schwerpunktbericht der Gesundheitsberichterstattung des Bundes: Gesundheit von Kindern und Jugendlichen. Berlin: Robert Koch Institut, 2004.

20. Koletzko B, Cremer M, Flothkotter M, Graf C, Hauner H, Hellmers C, et al. Diet and Lifestyle Before and During Pregnancy - Practical Recommendations of the Germany-wide Healthy Start - Young Family Network. *Geburtshilfe und Frauenheilkunde*. 2018 Dec;78(12):1262-82. PubMed PMID: 30655650. Pubmed Central PMCID: 6294644.
21. Miller WR, Rollnick S. *Motivational interviewing: Helping people change*, 3rd edition. 3 ed. New York: Guilford Press; 2013.
22. Barber MN, Staples M, Osborne RH, Clerehan R, Elder C, Buchbinder R. Up to a quarter of the Australian population may have suboptimal health literacy depending upon the measurement tool: results from a population-based survey. *Health promotion international*. 2009 Sep;24(3):252-61. PubMed PMID: 19531559.
23. Jordan S, Hoebel J. [Health literacy of adults in Germany: Findings from the German Health Update (GEDA) study]. *Bundesgesundheitsblatt, Gesundheitsforschung, Gesundheitsschutz*. 2015 Sep;58(9):942-50. PubMed PMID: 26227894. Gesundheitskompetenz von Erwachsenen in Deutschland : Ergebnisse der Studie "Gesundheit in Deutschland aktuell" (GEDA).
24. Wallston KA, Cawthon C, McNaughton CD, Rothman RL, Osborn CY, Kripalani S. Psychometric properties of the brief health literacy screen in clinical practice. *Journal of general internal medicine*. 2014 Jan;29(1):119-26. PubMed PMID: 23918160. Pubmed Central PMCID: 3889960.
25. Liu C, Wang D, Liu C, Jiang J, Wang X, Chen H, et al. What is the meaning of health literacy? A systematic review and qualitative synthesis. *Family medicine and community health*. 2020 May;8(2). PubMed PMID: 32414834. Pubmed Central PMCID: 7239702.
26. Rogozinska E, D'Amico MI, Khan KS, Cecatti JG, Teede H, Yeo S, et al. Development of composite outcomes for individual patient data (IPD) meta-analysis on the effects of diet and lifestyle in pregnancy: a Delphi survey. *BJOG : an international journal of obstetrics and gynaecology*. 2016 Jan;123(2):190-8. PubMed PMID: 26841002.
27. Tosun OC, Solmaz U, Ekin A, Tosun G, Mutlu EK, Okyay E, et al. The Turkish version of the pregnancy physical activity questionnaire: cross-cultural adaptation, reliability, and validity. *Journal of physical therapy science*. 2015 Oct;27(10):3215-21. PubMed PMID: 26644678. Pubmed Central PMCID: 4668169.
28. Kazemi A, Hajian S, Sharifi N. The Psychometric Properties of the Persian Version of the Pregnancy Physical Activity Questionnaire. *International Journal of Women's Health and Reproduction Sciences*. 2019;7(1):54-60.
29. Haftenberger M, Heuer T, Heidemann C, Kube F, Krems C, Mensink GB. Relative validation of a food frequency questionnaire for national health and nutrition monitoring. *Nutrition journal*. 2010 Sep 14;9:36. PubMed PMID: 20840739. Pubmed Central PMCID: 2945984.
30. Koch-Institut R. *Studie zur Gesundheit von Kindern und Jugendlichen. Elternfragebogen 669 0-2*. Berlin: 2003.
31. NAM. In: Rasmussen KM, Yaktine AL, editors. *Weight Gain During Pregnancy: Reexamining the Guidelines*. The National Academies Collection: Reports funded by National Institutes of Health. Washington (DC)2009.
32. LifeCycle Project-Maternal O, Childhood Outcomes Study G, Voerman E, Santos S, Inskip H, Amiano P, et al. Association of Gestational Weight Gain With Adverse Maternal and Infant Outcomes. *Jama*. 2019 May 7;321(17):1702-15. PubMed PMID: 31063572. Pubmed Central PMCID: 6506886.
33. Neubauer S, Zeidler J, Graf von der Schulenburg JM. *Grundlagen und Methoden von GKV-Routinedatenstudien*. Leibniz Universität Hannover, Center for Health Economics Research Hannover (CHERH), 2014 Contract No.: 534.
34. Lanpher MG, Askew S, Bennett GG. Health Literacy and Weight Change in a Digital Health Intervention for Women: A Randomized Controlled Trial in Primary Care Practice. *Journal of health communication*. 2016;21 Suppl 1:34-42. PubMed PMID: 27043756. Pubmed Central PMCID: 4935541.
35. Morton K, Beauchamp M, Prothero A, Joyce L, Saunders L, Spencer-Bowdage S, et al. The effectiveness of motivational interviewing for health behaviour change in primary care settings: a systematic review. *Health psychology review*. 2015;9(2):205-23. PubMed PMID: 26209209.

- 1  
2  
3 36. Sheinis M, Carpe N, Gold S, Selk A. Ignorance is bliss: women's knowledge regarding age-  
4 related pregnancy risks. *Journal of obstetrics and gynaecology : the journal of the Institute of*  
5 *Obstetrics and Gynaecology*. 2018 Apr;38(3):344-51. PubMed PMID: 29022426.  
6  
7 37. Sheinis M, Bensimon K, Selk A. Patients' Knowledge of Prenatal Screening for Trisomy 21.  
8 *Journal of genetic counseling*. 2018 Feb;27(1):95-103. PubMed PMID: 28707139.  
9  
10 38. Shieh C, Broome ME, Stump TE. Factors associated with health information-seeking in low-  
11 income pregnant women. *Women & health*. 2010 Jul;50(5):426-42. PubMed PMID: 20853218.  
12  
13 39. Yee LM, Wolf M, Mullen R, Bergeron AR, Cooper Bailey S, Levine R, et al. A randomized trial  
14 of a prenatal genetic testing interactive computerized information aid. *Prenatal diagnosis*. 2014  
15 Jun;34(6):552-7. PubMed PMID: 24578289. Pubmed Central PMCID: 4043849.  
16  
17 40. You WB, Wolf M, Bailey SC, Pandit AU, Waite KR, Sobel RM, et al. Factors associated with  
18 patient understanding of preeclampsia. *Hypertension in pregnancy*. 2012;31(3):341-9. PubMed  
19 PMID: 20860492.  
20  
21  
22  
23  
24  
25  
26  
27  
28  
29  
30  
31  
32  
33  
34  
35  
36  
37  
38  
39  
40  
41  
42  
43  
44  
45  
46  
47  
48  
49  
50  
51  
52  
53  
54  
55  
56  
57  
58  
59  
60

For peer review only

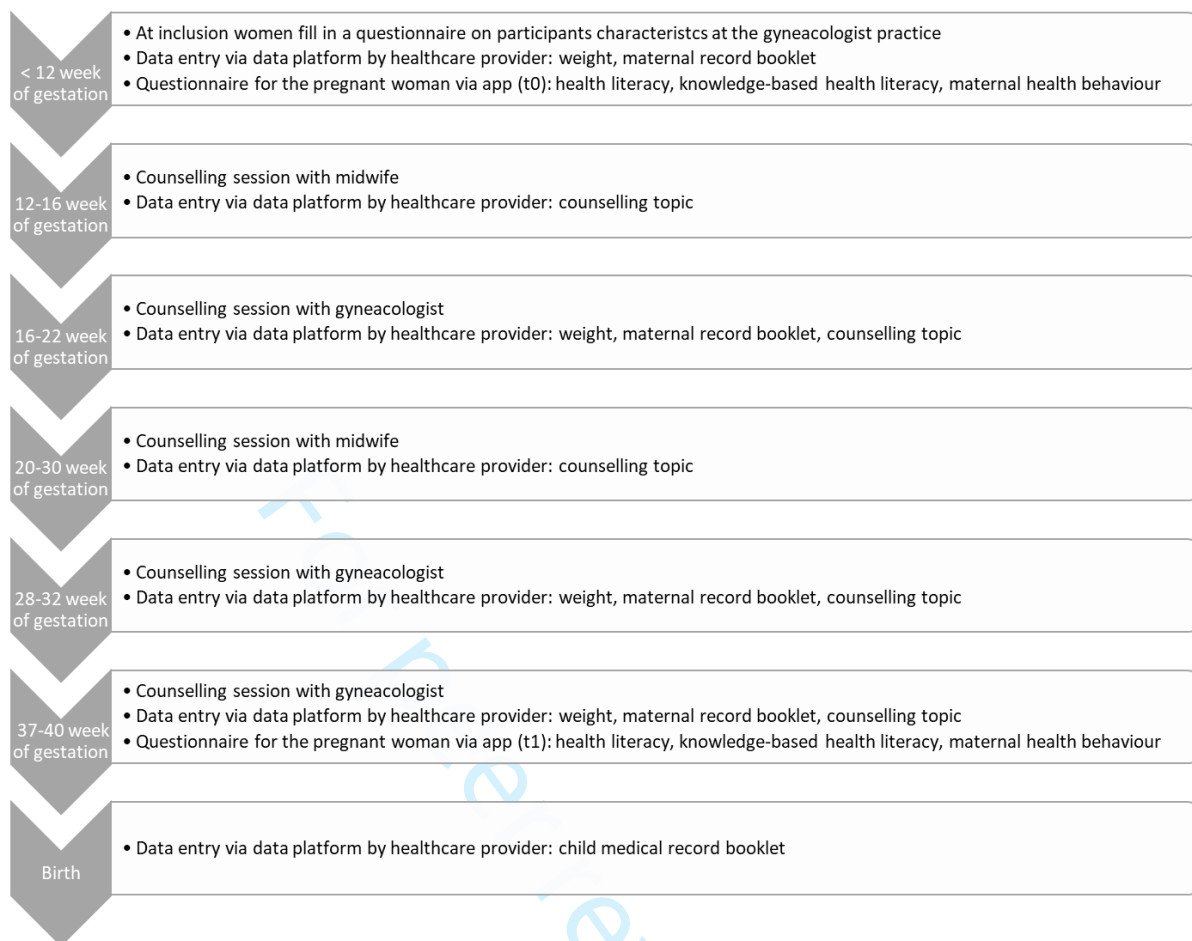

Figure 1 Overview of counselling sessions and time points of data collection



1  
2  
3  
4  
5  
6  
7  
8  
9  
10  
11  
12  
13  
14  
15  
16  
17  
18  
19  
20  
21  
22  
23  
24  
25  
26  
27  
28  
29  
30  
31  
32  
33  
34  
35  
36  
37  
38  
39  
40  
41  
42  
43  
44  
45  
46  
47  
48  
49  
50  
51  
52  
53  
54  
55  
56  
57  
58  
59  
60

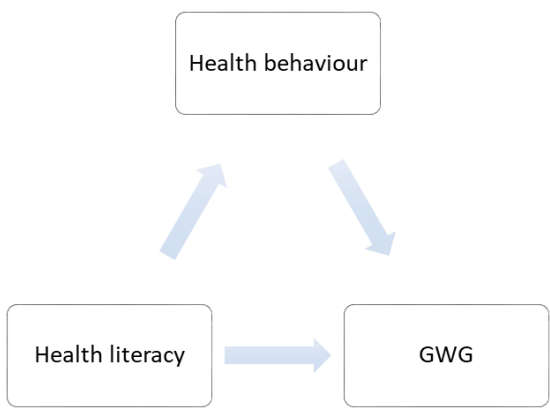

Figure 2 Mediation Model

For peer review only

# BMJ Open

## Health literacy among pregnant women in a lifestyle intervention trial: Protocol for an explorative study on the role of health literacy in the perinatal health service setting

|                                 |                                                                                                                                                                                                                                                                                                                                                                                                                                                                                                                                                                                                                                                                                                             |
|---------------------------------|-------------------------------------------------------------------------------------------------------------------------------------------------------------------------------------------------------------------------------------------------------------------------------------------------------------------------------------------------------------------------------------------------------------------------------------------------------------------------------------------------------------------------------------------------------------------------------------------------------------------------------------------------------------------------------------------------------------|
| Journal:                        | <i>BMJ Open</i>                                                                                                                                                                                                                                                                                                                                                                                                                                                                                                                                                                                                                                                                                             |
| Manuscript ID                   | bmjopen-2020-047377.R1                                                                                                                                                                                                                                                                                                                                                                                                                                                                                                                                                                                                                                                                                      |
| Article Type:                   | Protocol                                                                                                                                                                                                                                                                                                                                                                                                                                                                                                                                                                                                                                                                                                    |
| Date Submitted by the Author:   | 01-Jun-2021                                                                                                                                                                                                                                                                                                                                                                                                                                                                                                                                                                                                                                                                                                 |
| Complete List of Authors:       | Nawabi, Farah; University of Cologne Institute of Health Economics and Clinical Epidemiology,<br>Alayli, Adrienne; University of Cologne Institute of Health Economics and Clinical Epidemiology; Federal Centre for Health Education<br>Krebs, Franziska; University of Cologne Institute of Health Economics and Clinical Epidemiology<br>Lorenz, Laura; University of Cologne Institute of Health Economics and Clinical Epidemiology<br>Shukri, Arim; University of Cologne Institute of Health Economics and Clinical Epidemiology<br>Bau, Anne-Madeleine; Platform Nutrition and Physical Activity<br>Stock, Stephanie; University of Cologne Institute of Health Economics and Clinical Epidemiology |
| <b>Primary Subject Heading</b>: | Public health                                                                                                                                                                                                                                                                                                                                                                                                                                                                                                                                                                                                                                                                                               |
| Secondary Subject Heading:      | Public health                                                                                                                                                                                                                                                                                                                                                                                                                                                                                                                                                                                                                                                                                               |
| Keywords:                       | PUBLIC HEALTH, EDUCATION & TRAINING (see Medical Education & Training), PRIMARY CARE, Maternal medicine < OBSTETRICS                                                                                                                                                                                                                                                                                                                                                                                                                                                                                                                                                                                        |
|                                 |                                                                                                                                                                                                                                                                                                                                                                                                                                                                                                                                                                                                                                                                                                             |

SCHOLARONE™  
Manuscripts



I, the Submitting Author has the right to grant and does grant on behalf of all authors of the Work (as defined in the below author licence), an exclusive licence and/or a non-exclusive licence for contributions from authors who are: i) UK Crown employees; ii) where BMJ has agreed a CC-BY licence shall apply, and/or iii) in accordance with the terms applicable for US Federal Government officers or employees acting as part of their official duties; on a worldwide, perpetual, irrevocable, royalty-free basis to BMJ Publishing Group Ltd ("BMJ") its licensees and where the relevant Journal is co-owned by BMJ to the co-owners of the Journal, to publish the Work in this journal and any other BMJ products and to exploit all rights, as set out in our [licence](#).

The Submitting Author accepts and understands that any supply made under these terms is made by BMJ to the Submitting Author unless you are acting as an employee on behalf of your employer or a postgraduate student of an affiliated institution which is paying any applicable article publishing charge ("APC") for Open Access articles. Where the Submitting Author wishes to make the Work available on an Open Access basis (and intends to pay the relevant APC), the terms of reuse of such Open Access shall be governed by a Creative Commons licence – details of these licences and which [Creative Commons](#) licence will apply to this Work are set out in our licence referred to above.

Other than as permitted in any relevant BMJ Author's Self Archiving Policies, I confirm this Work has not been accepted for publication elsewhere, is not being considered for publication elsewhere and does not duplicate material already published. I confirm all authors consent to publication of this Work and authorise the granting of this licence.

1 **Title** Health literacy among pregnant women in a lifestyle intervention trial: Protocol for an  
2 explorative study on the role of health literacy in the perinatal health service setting

3  
4  
5  
6  
7  
8  
9  
10  
11 **Corresponding Author:**

12  
13  
14  
15 Farah Nawabi, M.Sc.<sup>1</sup> [farah.nawabi@uk-koeln.de](mailto:farah.nawabi@uk-koeln.de) <https://orcid.org/0000-0002-9433-1390>

16  
17  
18 **Postal address:** Institute of Health Economics and Clinical Epidemiology, University  
19 Hospital Cologne, Gleueler Straße 176-178, 50935 Cologne, Germany

20  
21  
22  
23 **E-mail:** [farah.nawabi@uk-koeln.de](mailto:farah.nawabi@uk-koeln.de)

24  
25  
26  
27 **Telephone number:** +49 221 478 30917

28  
29  
30 **Co-Authors**

31  
32  
33 Adrienne Alayli, Ph.D.<sup>1,2</sup> [adrienne.alayli@uk-koeln.de](mailto:adrienne.alayli@uk-koeln.de) <https://orcid.org/0000-0001-8859-4285>

34  
35  
36 Franziska Krebs, M.Sc.<sup>1</sup> [franziska.krebs@uk-koeln.de](mailto:franziska.krebs@uk-koeln.de) <https://orcid.org/0000-0002-5998-3801>

37  
38  
39 Laura Lorenz, M.Sc.<sup>1</sup> [laura.lorenz@uk-koeln.de](mailto:laura.lorenz@uk-koeln.de) <https://orcid.org/0000-0003-2799-5784>

40  
41  
42 Arim Shukri, Dipl.–Math.<sup>1</sup> [arim.shukri@uk-koeln.de](mailto:arim.shukri@uk-koeln.de)

43  
44  
45 Dr. Anne-Madeleine Bau<sup>3</sup> [am.bau@pebonline.de](mailto:am.bau@pebonline.de)

46  
47  
48 Prof. Dr. med. Stephanie Stock<sup>1</sup> [stephanie.stock@uk-koeln.de](mailto:stephanie.stock@uk-koeln.de) <https://orcid.org/0000-0002-1726-9300>

49  
50  
51  
52  
53  
54  
55 <sup>1</sup> University of Cologne, Faculty of Medicine and University Hospital Cologne, Institute for  
56 Health Economics and Clinical Epidemiology, University Hospital Cologne, Cologne,  
57 Germany

58  
59  
60 <sup>2</sup> Federal Centre for Health Education (BZgA), Cologne, Germany

1  
2  
3 24 <sup>3</sup> Platform Nutrition and Physical Activity (peb), Berlin, Germany  
4  
5 25  
6  
7

8 26 **Keywords**  
9

10  
11 27 Health literacy, behaviour, pregnant women, gestational weight gain, lifestyle intervention  
12  
13

14  
15 28 Word count: 4.453  
16  
17 29

18 30 **Abstract**

19 30 **Abstract**  
20 31 **Introduction:** Pregnancy is a vulnerable period that affects long-term health of pregnant  
21 32 women and their unborn infants. Health literacy plays a crucial role in promoting healthy  
22 33 behaviour and thereby maintaining good health. This study explores the role of health literacy  
23 34 in the GeMuKi project. It will assess the ability of the GeMuKi lifestyle intervention to  
24 35 positively affect health literacy levels through active participation in preventive counselling.  
25 36 The study also explore associations between health literacy, health outcomes, health services  
26 37 use and effectiveness of the intervention.  
27  
28  
29  
30  
31  
32  
33  
34  
35  
36

37 38 **Methods and analysis:** The GeMuKi (acronym for “Gemeinsam Gesund: Vorsorge plus für  
38 39 Mutter und Kind” - Strengthening health promotion: enhanced check-up visits for mother and  
39 40 child) trial has a hybrid effectiveness-implementation design and is carried out in routine  
40 41 prenatal health service settings in Germany. Women (n= 1860) are recruited by their  
41 42 gynaecologist during routine check-up visits before 12 weeks of gestation. Trained healthcare  
42 43 providers carry out counselling using Motivational Interviewing techniques to positively  
43 44 affect health literacy and lifestyle-related risk factors. Healthcare providers (gynaecologists  
44 45 and midwives) and women jointly agree upon SMART (Specific, Measurable, Achievable  
45 46 Reasonable, Time-Bound) goals. Women will be invited to fill in questionnaires at two time  
46 47 points (at recruitment and 37<sup>th</sup> -40<sup>th</sup> week of gestation) using an App. Health Literacy is  
47 48 measured using the German version of the Health Literacy Survey 16 and the Brief Health  
48

1  
2  
3 49 Literacy Screener. Lifestyle is measured with questions on physical activity, nutrition, alcohol  
4  
5 50 and drug use. Health outcomes of both mother and child, including gestational weight gain  
6  
7 51 (GWG) will be documented at each routine visit. Health service use will be assessed using  
8  
9 52 social health insurance claims data. Data analyses will be conducted using IBM SPSS  
10  
11 53 Statistics. They include descriptive statistics, tests, and regression models. A mediation model  
12  
13 54 will be conducted to answer the question whether health behaviour mediates the association  
14  
15 55 between health literacy and GWG.

16  
17  
18  
19  
20 56 **Ethics and dissemination:** The study was approved by the University Hospital of Cologne  
21  
22 57 Research Ethics committee (ID: 18-163) and the State Chamber of Physicians in Baden-  
23  
24 58 Wuerttemberg (ID: B-F-2018-100). Study results will be disseminated through (poster)  
25  
26 59 presentations at conferences, publications in peer-reviewed journals and press releases.

### 60 **Strengths and limitations of this study**

- 61 • Health literacy will be measured subjectively as well as objectively
- 62 • All questionnaires are self-administered, which might lead to overestimation
- 63 • A comprehensive recruitment strategy, supported by all German statutory health  
64 insurances will contribute to inclusion of pregnant women with different health  
65 literacy levels
- 66 • Women not proficient in German language are not included, which might result in  
67 exclusion of migrants and illiterate women
- 68 • As inclusion takes place before the 12<sup>th</sup> week of gestation, other vulnerable groups that  
69 are less likely to use early antenatal care might not be included (such as women under  
70 the age of 18, heavy drug or alcohol users)

71

## INTRODUCTION

Health literacy describes a person's ability to access, understand, appraise and apply health information to make informed decisions regarding their health (1). Inadequate health literacy is associated with a diversity of negative outcomes such as more hospital visits and medication use, less utilization of screenings as well as negative health behaviours, such as drug and alcohol use and unhealthy nutrition (2) (3). Accordingly, adequate health literacy is important to achieve and maintain good health.

A population-based study in 2014 revealed that more than 50% of the German population has an inadequate health literacy level (4). As a result, a group of experts from academia, practice and policy was formed to develop a 'National Action Plan Health Literacy' (NAP) to improve health literacy in Germany (5) (6). The action plan advocates for addressing health literacy both early in life and through measures at the healthcare system level, e.g. by facilitating navigation, creating user-friendly information as well as comprehensible communication between health professionals and users (5). The action plan points out that measures to strengthen health literacy should focus on various user groups in the healthcare system, particularly vulnerable groups, for example people with limited socio-economic resources and people with migration backgrounds.

Pregnancy is a vulnerable time in which pregnant women are confronted with a diversity of changes, not only physically, but also with regards to the responsibilities of being pregnant and becoming a parent. These changes make women and parents sensible to preventive health information (7). However, the large quantity and diverse quality of the available information make it difficult for women to understand and to decide, which information is relevant for them (8). Studies demonstrate that compared to women with adequate health literacy, women with inadequate level of health literacy more frequently smoke during pregnancy, do not exclusively breastfeed their child the first months after birth and do not engage in prenatal

1  
2  
3 97 care at the beginning of the pregnancy (9) (10) (11) (12) (13). These lifestyle behaviours are  
4  
5 98 likely to impact long-term health outcomes of both mother and child. Through a process  
6  
7 99 referred to as perinatal programming, external factors such as maternal health behaviours  
8  
9  
10 100 influence the foetal development alongside genetic factors and thereby affect the risk of  
11  
12 101 developing obesity and chronic diseases (14). For example, a pregnant woman's nutrition and  
13  
14 102 physical activity can result in excessive gestational weight gain (GWG). GWG is linked to  
15  
16 103 increased pregnancy and birth complications, including the risk for obesity or chronic  
17  
18 104 conditions, such as type 2 diabetes in the offspring (15). Therefore, to reduce these risk  
19  
20 105 factors it seems important that pregnant women find, understand and apply health information  
21  
22 106 relevant for a healthy lifestyle and GWG during pregnancy.  
23  
24  
25

26  
27 107 Research suggests that health literacy sensitive educational interventions promote desirable  
28  
29 108 health outcomes such as self-care behaviour, particularly physical activity (16). To date  
30  
31 109 however, little is known about the role of health literacy during pregnancy. Health literacy  
32  
33 110 interventions for pregnant women and studies examining the effectiveness of such are also  
34  
35 111 lacking (17) (18). Interventions that exist do not measure health literacy directly, which leads  
36  
37 112 to the lack of evidence in this area (17) (18). This study seeks to address this gap. It explores  
38  
39 113 the relationship of health literacy with other variables within the GeMuKi project. The  
40  
41 114 GeMuKi (acronym for "Gemeinsam Gesund: Vorsorge plus für Mutter und Kind" -  
42  
43 115 Strengthening health promotion: enhanced check-up visits for mother and child) project  
44  
45 116 examines a novel lifestyle intervention during pregnancy. The intervention consists of a brief  
46  
47 117 lifestyle intervention implemented during routine prenatal check-ups (also often referred to as  
48  
49 118 antenatal appointments) in the German state of Baden-Wuerttemberg. The intervention aims  
50  
51 119 to contribute to a healthy lifestyle and GWG by strengthening health literacy of pregnant  
52  
53 120 women. Building upon the NAP, GeMuKi seeks to strengthen HL through a) involving the  
54  
55 121 pregnant women actively in the counselling, b) enabling participation when setting joint goals  
56  
57  
58  
59  
60



122 to improve health behaviour c) making health information understandable in counselling  
123 sessions.

124 For the present study, it is hypothesised that a) health literacy levels are positively affected by  
125 the GeMuKi intervention through increased knowledge, more active participation, better  
126 adherence to lifestyle goals and that b) health literacy has an impact on further variables,  
127 including health outcomes, health behaviour as well as health service use during pregnancy.

128 The following research questions will be answered:

- 129 1. Can health literacy levels in pregnant women be improved by means of the GeMuKi  
130 lifestyle intervention during regular check-ups?
- 131 2. Do health outcomes, health behavior and health service use differ between pregnant  
132 women with high and low health literacy levels participating in the GeMuKi lifestyle  
133 intervention trial?
- 134 3. Is the association between health literacy and weight development during pregnancy  
135 mediated by health behaviour?

## 136 METHODS

137 Data on health literacy, health outcomes and health service use during pregnancy will be  
138 collected in the GeMuKi project, which started in October 2017 and will end in March 2022.  
139 The project uses a hybrid effectiveness-implementation design (Type II). Hybrid  
140 effectiveness-implementation designs allow for the blended assessment of clinical  
141 effectiveness and implementation to rapidly translate research results into practice. Type II  
142 indicates that clinical and implementation areas are tested simultaneously as opposed to other  
143 types (19). The study consists of two arms: the intervention group receives a brief  
144 counselling (GeMuKi) in addition to regular care, while the control group receives regular  
145 care. The lifestyle intervention takes place during up to eleven regular check-up visits during  
146 pregnancy and the infants' first year. The present study will focus on the period from the first

1  
2  
3 147 check-up during pregnancy until birth. It will consider only check-ups conducted by  
4  
5 148 gynaecologists and midwives. Since the study takes place in Germany, the setting needs  
6  
7 149 explanation: in the German healthcare system women usually visit a gynaecologist to confirm  
8  
9 150 a pregnancy and from then onward visit their gynaecologist and if possible midwife for  
10  
11 151 check-up appointments. A detailed description of the general design of the GeMuKi project  
12  
13 152 can be found elsewhere (20). Health literacy is a complex concept that has been insufficiently  
14  
15 153 studied during the time of pregnancy. Therefore, a separate in depth analysis of health literacy  
16  
17 154 related aspects is warranted. This paper particularly focusses on health literacy and addresses  
18  
19 155 research questions that have not been described elsewhere, as they go beyond the evaluation  
20  
21 156 of effectiveness and implementation of the GeMuKi project.  
22  
23  
24  
25  
26

### 27 157 **Study sample**

28  
29 158 The study sample is recruited in participating gynaecologist practices. Gynaecologists  
30  
31 159 determine the eligibility of pregnant women, using the following inclusion criteria:  $\geq 18$  years  
32  
33 160 old,  $< 12$  weeks of gestation at recruitment, proficient German language skills. Women are not  
34  
35 161 eligible when scoring high on the Edinburgh Postnatal Depression Scale (EPDS), defined as a  
36  
37 162 total score of greater than nine (= probability of a depression) or a score of three (= answering  
38  
39 163 'yes, very often') on item number 10 "The thought of harming myself has occurred to me".  
40  
41 164 The exclusion is justified by the probability of depression and / or suicidal thoughts for which  
42  
43 165 women need urgent and particular care. In the event of the explained scoring, the project team  
44  
45 166 also suggests another project, which takes place simultaneously with a focus on maternal  
46  
47 167 depression. This procedure aims to reduce the risk of bias that could be introduced by co-  
48  
49 168 interventions (Alayli et al., 2020).  
50  
51  
52  
53

54  
55 169 The sample is expected to include a wide range of health literacy levels, since inclusion  
56  
57 170 criteria are widely defined and different statutory health insurances partake in the project with  
58  
59 171 different characteristics of the insured people. The inclusion of different insurances that exist  
60

1  
2  
3 172 in Germany allow to include women with diverse socio-economic status<sup>6</sup>, migration  
4  
5 173 background and health status (e.g. smoking behaviour, obesity and cardiovascular disease)  
6  
7  
8 174 (21). Moreover, about 84% of all pregnant women come for the first check-up before the 13th  
9  
10 175 week of pregnancy; 80% attend at least 10 preventive examinations during pregnancy (22).

11  
12  
13 176 A more detailed description of the study sample is provided by Alayli and colleagues (2020)  
14  
15 177 (20). They estimated 1860 participants to be needed in the study. For the health literacy  
16  
17 178 related research questions described here, this sample size is considered sufficient. To  
18  
19 179 counteract cumulating Type 1 errors due to multiple testing, Bonferroni corrections will be  
20  
21  
22 180 made.

### 181 Health literacy strengthening intervention

182 GeMuKi is a multi-professional computer-assisted lifestyle intervention. During pregnancy,  
183 the intervention is carried out by gynaecologists and midwives. It aims at strengthening health  
184 literacy and positively affecting lifestyle-related risk factors in women and their infants.

#### 185 *Preventive counselling to strengthen health literacy*

186 Health literacy will be strengthened during the counselling sessions by actively involving  
187 pregnant women in the decision making process, which lifestyle topic to focus on in the  
188 counselling. This way, women reveal themselves in which areas they need further counselling  
189 and the healthcare provider does not provide information when it is not needed. Participation  
190 is one of the recommendations of the NAP to improve health literacy. The topics of the  
191 counselling are based on the national recommendations on a health promoting lifestyle during  
192 pregnancy and after birth from the "Healthy Start – Young Family Network" (Netzwerk  
193 Gesund ins Leben (GiL) (23). The recommendations provide gynaecologists, midwives,  
194 paediatricians and other medical professions with a basis for counselling a healthy lifestyle  
195 (23). The first recommendations from 2012 were updated in 2018, adding recommendations  
196 for the time before pregnancy and around the conception phase (23).

1  
2  
3 197 To strengthen health literacy of the participants, healthcare providers receive a training,  
4  
5 198 focussing on lifestyle during pregnancy, including nutrition and physical activity. Healthcare  
6  
7 199 providers are trained to communicate key messages from the recommendations by means of  
8  
9 200 Motivational Interviewing (MI). The counselling is practiced in role plays with all  
10  
11 201 participants. As behaviour change is considered a health literacy skill, MI is utilised, which is  
12  
13 202 built upon the notion that people autonomously change their behaviour (24). This should be  
14  
15 203 considered by healthcare providers when carrying out the counselling: healthcare providers  
16  
17 204 are supposed to actively listen and react with open-ended questions to trigger behaviour  
18  
19 205 change. It is in line with the NAP, which recommends that health professionals should  
20  
21 206 communicate sensitive to the health literacy levels of the individual in order to positively  
22  
23 207 affect their health literacy and thus health behaviour. At the end of each counselling  
24  
25 208 appointment, the participant along with the support of the healthcare provider will set up  
26  
27 209 SMART (Specific Measurable Achievable Reasonable Time Bound) goals to positively  
28  
29 210 change behaviour, which can be accomplished until the next appointment. The SMART goals  
30  
31 211 are individualised and adapted to the capacities of women. This way, the counselling as well  
32  
33 212 as the SMART goals are tailored to the health literacy levels of women.  
34  
35  
36  
37  
38  
39

#### 40 213 *Digital intervention component to strengthen health literacy*

41  
42 214 Digitalisation is used as recommended by the NAP to strengthen health literacy by providing  
43  
44 215 pregnant women with the GeMuKi-App. The App is used by the participants to 1) receive  
45  
46 216 health information on pregnancy and 2) receive the SMART goals as push-notifications. The  
47  
48 217 App is designed in an easy to handle way, which is accessible for women with different health  
49  
50 218 literacy levels. App usage on mobiles phones is the most appropriate way to reach women, as  
51  
52 219 research suggests that women with low level of health literacy rather use mobile phones than  
53  
54 220 email communication or the internet (25). For purposes of the evaluation study, the App is  
55  
56 221 also used by pregnant women to fill in questionnaires.  
57  
58  
59  
60

222 Healthcare providers enter results from the maternity check-ups into the maternity and child  
 223 medical record booklets. These data, along with GWG and the chosen lifestyle topic are  
 224 entered into the GeMuKi-Assist counselling tool. The tool is a component of the telehealth  
 225 platform GeMuKi-Assist, which was particularly developed for the healthcare providers. The  
 226 counselling tool also provides supporting questions on each counselling topic that healthcare  
 227 providers can ask during the counselling, which are built upon the tenets of MI. In this  
 228 platform, healthcare providers document the SMART goals during each counselling, which  
 229 later will be displayed in the women's App. Via the counselling tool, the gynaecologist and  
 230 midwife of a particular woman have access to the chosen lifestyle topics, goals and medical  
 231 record booklet data to ensure continuity of the counselling. Study coordinators are available in  
 232 every study region to support healthcare providers with any question arising, including  
 233 questions on the content of the counselling, the counselling procedure, data entry and  
 234 technical support. In addition to that, handouts and folders are handed to all participating  
 235 healthcare providers before patient recruitment starts.

## 236 Variables

237 Table 1 provides a summary of the variables that will be used in the data analysis. Data will  
 238 be derived from various data sources collected in the GeMuKi project: weight, data from the  
 239 maternity record booklet and child medical record booklet are entered by healthcare providers  
 240 in the GeMuKi-Assist counselling tool. The App for women entails questionnaires that  
 241 women fill in at two time points during pregnancy (Figure 1). Participating health insurances  
 242 provide health insurance claims data.

243 *Table 1 Variables and data sources*

| Variable                            | Data source                          | Measures                                           |
|-------------------------------------|--------------------------------------|----------------------------------------------------|
| Participant characteristics         | Paper based questionnaire            | Age, weight, height (also from the child's father) |
| Health literacy                     | Questionnaires filled in, in the App | HLS-EU-16*, BHLS**, knowledge based questions      |
| Maternal health outcomes (including | Maternity record booklet             | Health data such as weight,                        |

|                                     |                                                                      |                                                                            |
|-------------------------------------|----------------------------------------------------------------------|----------------------------------------------------------------------------|
| GWG)                                | data, entered into the counselling tool                              | gestational diabetes mellitus                                              |
| Foetal and neonatal health outcomes | Child medical record booklet data, entered into the counselling tool | Health data such as large for gestational age                              |
| Maternal health behaviour           | Questionnaires filled in, in the App                                 | PPAQ***, FFQ****, alcohol and smoking                                      |
| Health services use                 | Health insurance claims data                                         | In and outpatient treatment, medication use, aids and remedies, sick leave |

244 \*HLS-EU-16 (Health Literacy Survey 16 items); \*\*B HLS (Brief Health Literacy Screener); \*\*\*PPAQ  
 245 (Pregnancy Physical Activity Questionnaire); \*\*\*\*FFQ (Food Frequency Questionnaire)

### 246 247 *Participant characteristics*

248 Demographic information and anthropometric data (such as height and length) to characterize  
 249 the sample will be derived from a paper-based questionnaire handed out at baseline in the  
 250 GeMuKi project (before the 12<sup>th</sup> week of gestation; Figure 1) of both pregnant women and the  
 251 infant's father. These data will give information on the BMI of the parents, which later will be  
 252 included in the analysis (20).

253  
 254 <Please insert figure 1 here with the legend: Figure 1 Overview of counselling sessions and  
 255 time points of data collection>

### 256 257 *Health Literacy*

258 Health literacy is assessed using different instruments: the Health Literacy Survey (HLS-EU-  
 259 16) will be utilised at baseline, to assess a detailed description of the general health literacy  
 260 levels of pregnant women. When applied in the German general population it has shown a  
 261 high internal consistency (Cronbach's Alpha of 0.90) (26). Additionally, this instrument has  
 262 been utilised in other studies in Germany, offering the possibility to compare results with our  
 263 study population. Questions can be answered on a 5-point Likert Scale ('very difficult' –  
 264 'very easy'; 'I don't know'). Since the HLS-EU-16 also includes questions on illness, these  
 265 questions may not be suitable for our study population as we cannot assume that all pregnant

1  
2  
3 266 women have some kind of illness and pregnancy cannot be translated into illness. Therefore,  
4  
5 267 we have supplemented the regular 16 item HLS-EU-16 with two further questions, which  
6  
7  
8 268 particularly aim at pregnancy (“How easy would you say it is to find information on your  
9  
10 269 pregnancy?” and “How easy would you say it is to use information the doctor gives you to  
11  
12 270 make decisions about your pregnancy?”). Since paper-based questionnaires provide the option  
13  
14 271 to not tick an answer and skip questions, for all questions the additional response category ‘I  
15  
16 272 do not want to answer this question’ is included in the App based survey. To assess change in  
17  
18 273 health literacy as a result of the GeMuKi intervention, the Brief Health Literacy Screener  
19  
20 274 (BHLS) will be used at both time points (t0 and t1). The tool screens for inadequate health  
21  
22 275 literacy using three questions, which can be answered on a 5-point Likert Scale (‘never’ –  
23  
24 276 ‘always’ and additionally ‘I do not want to answer this question’). Other studies demonstrated  
25  
26 277 high internal consistency for this instrument with a Cronbach’s Alpha of 0.80 among hospital  
27  
28 278 patients (27). Modification of health literacy levels will be observed by assessing changes in  
29  
30 279 the proportion of study participants with inadequate health literacy between the beginning and  
31  
32 280 end of pregnancy.  
33  
34  
35  
36  
37  
38  
39

#### 40 281 41 282 *Knowledge-based health literacy*

42 283 In addition to the above described measures, which provide subjective estimates of health  
43  
44 284 literacy, an objective measure of health literacy was developed, consisting of knowledge-  
45  
46 285 based questions. Knowledge-based questionnaires can be used to assess health literacy  
47  
48 286 because knowledge acts as a proxy for health literacy (28). Each question was developed  
49  
50 287 based on the topics of the national recommendations discussed during counselling. They  
51  
52 288 cover the following topics: weight development, nutrition, alcohol and drug use, physical  
53  
54 289 activity, water intake and breastfeeding. The questionnaire was developed by researchers of  
55  
56 290 the project with the support of nutritionists that work in the project. Answers can be given on  
57  
58  
59  
60

1  
2  
3 291 a 'yes/no/I don't know' scale. The questionnaire will be statistically analysed calculating  
4  
5 292 frequencies of correct answers.  
6  
7  
8 293

9  
10 294 *Maternal health outcomes*

11  
12 295 During every routine prenatal visit, practice assistants enter data from the maternity record  
13  
14 296 booklet into the GeMuKi-Assist counselling tool. To evaluate maternal health outcomes one  
15  
16 297 composite measure will be used, derived from the following variables: pre-eclampsia or  
17  
18 298 pregnancy-induced hypertension, gestational diabetes mellitus (GDM), caesarean section, and  
19  
20 299 preterm delivery. This measure has been proposed in a Delphi study on the evaluation of  
21  
22 300 lifestyle interventions during pregnancy (29).  
23  
24  
25  
26 301

27  
28 302 *Foetal and neonatal health outcomes*

29  
30 303 Health data of the child will be recorded at birth in the child medical record booklet. It entails  
31  
32 304 amongst others the following variables: small for gestational age and large for gestational age.  
33  
34  
35 305

36  
37 306 *Maternal health behaviour*

38  
39 307 Physical activity will be measured using the Pregnancy Physical Activity Questionnaire  
40  
41 308 (PPAQ). This instrument assesses the duration, frequency and intensity of physical activity in  
42  
43 309 pregnant women. It has been used internationally and exhibits Cronbach's alphas above the  
44  
45 310 threshold of 0.70 (30) (31). Nutrition will be assessed using an adjusted version of the Food  
46  
47 311 Frequency Questionnaire (FFQ) from the German Health Examination Survey for Adults  
48  
49 312 (DEGS) (32). This instrument evaluates the frequency of consumption of food groups.  
50  
51 313 Alcohol and smoking is assessed using questions from the German Health Interview and  
52  
53 314 Examination Survey for Children and Adolescents (KIGGS) (33).  
54  
55  
56  
57  
58 315

59  
60 316 *GWG*



317 Maternal weight is documented in every pregnancy check-up visit using the maternity record  
 318 booklet and entered into the telehealth platform GeMuKi-Assist. In this study, the  
 319 recommended range of GWG is defined according to the Health and Medicine Division of the  
 320 National Academies of Science, Engineering and Medicine (NAM) (34). The  
 321 recommendations are based on prenatal BMI and are displayed in Table 2.

322 *Table 2 Weight gain recommendations adjusted by BMI*

| Weight        | BMI (kg/m <sup>2</sup> ) | Recommended weight gain (range in kg) |
|---------------|--------------------------|---------------------------------------|
| Underweight   | <18.5                    | 12.5-18                               |
| Normal weight | 18.5-24.9                | 11.5-16                               |
| Overweight    | 25.0-29.9                | 7-11.5                                |
| Obese         | ≥ 30.0                   | 5-9                                   |

323 Weight gain above the recommendation is classified as excessive weight gain. These  
 324 recommendations were recently confirmed by 25 pooled cohort studies (35).

### 325 *Health services use*

326 Data on health services use will be based on health insurance claims and delivered by the  
 327 participating health insurances. These data are pseudonymised and entail data on in- and  
 328 outpatient treatment (diagnosis, duration of hospital stay and costs), medication use  
 329 (pharmaceuticals, amount and costs), aids and remedies (duration of service and costs), and  
 330 sick leave periods (duration of sick leave and sick pay) (36).

### 332 **Data analysis**

333 Plausibility checks of the data will be performed continuously during data collection and  
 334 before data analysis. Multiple imputation methods will be used to deal with missing values.  
 335 Descriptive statistics will be used to analyse participant characteristics, such as age and BMI  
 336 at baseline. Correlations will be calculated to examine whether health literacy levels vary  
 337 depending on BMI, health outcomes, socioeconomic status and migration background.

1  
2  
3 338 Differences in means will be calculated to answer whether the intervention improved health  
4  
5 339 literacy levels in pregnant women. Health literacy change will be analysed comparing the  
6  
7 340 proportion of women with inadequate health literacy at baseline and end of pregnancy.  
8  
9 341 Regression analysis will be utilised to answer the question whether health literacy levels  
10  
11 342 influence the effectiveness of GeMuKi as well as maternal and foetal health outcomes and  
12  
13 343 health services use. A mediation analysis will be conducted to answer the question whether  
14  
15 344 health behaviour (mediator) mediates the association between health literacy (independent  
16  
17 345 variable) and GWG (dependent variable) (Figure 2).  
18  
19  
20  
21  
22

346

23  
24 347 <Please insert figure 2 here with the legend: Figure 2 Mediation Model>  
25  
26

## 27 348 Patient and Public Involvement

28  
29 349 Within the frame of the GeMuKi project, a process evaluation will be conducted, including  
30  
31 350 interviews with participating pregnant women. The interviews aim to answer questions on  
32  
33 351 hindering and supporting factors of the intervention. The overall results of the GeMuKi  
34  
35 352 project will be made available to all participants at the end of the project period.  
36  
37  
38  
39

## 40 353 ETHICS AND DISSEMINATION

41  
42 354 The GeMuKi project was approved by the University Hospital of Cologne Research Ethics  
43  
44 355 committee (ID: 18-163) and the State Chamber of Physicians in Baden-Wuerttemberg (ID: B-  
45  
46 356 F-2018-100). Inference to study participants is not possible since the collected data is  
47  
48 357 pseudonymised in accordance with the EU General Data Protection Regulation (GDPR).  
49  
50 358 Written informed consent will be obtained from all study participants at baseline. Participants  
51  
52 359 are reassured that they are free to withdraw from the study at any time during the study  
53  
54 360 without consequences. Study results will be disseminated through (poster) presentation at  
55  
56 361 conferences and publications in peer-reviewed journals. Additionally, press releases are made  
57  
58  
59  
60

1  
2  
3 362 to inform the general public. A closing event is planned with stakeholders to discuss the  
4  
5 363 potential implementation of GeMuKi into regular care.  
6  
7  
8 364

## 11 DISCUSSION

12 365  
13 366 To date there is little research on health literacy in pregnant women and interventions to  
14  
15 367 improve health literacy in this population according to two newly published systematic  
16  
17 368 reviews (17) (18) . Even though pregnant women are confronted with a variety of health  
18  
19 369 information during pregnancy, it is difficult to differentiate between the quality of information  
20  
21 370 and which one is important (8). This is particularly important in the light of informed  
22  
23 371 decision-making not only to make a decision for their own health but also for the infant (37).  
24  
25 372 Studies indicate that adequate health literacy support pregnant women in deciding to use  
26  
27 373 complementary medicine products (38). Studies on health literacy in pregnant women are  
28  
29 374 scarce and if they exist, they do not evaluate the change of health literacy as a result of an  
30  
31 375 intervention (17). To our knowledge, this is the first study assessing the impact of an  
32  
33 376 intervention that aims at improving health literacy in pregnant women and the influence of  
34  
35 377 health literacy on various outcomes during pregnancy, such as GWG, lifestyle and health  
36  
37 378 service use. It is hypothesised that health literacy is increased by a lifestyle intervention that is  
38  
39 379 health literacy sensitive.  
40  
41  
42  
43  
44  
45

46 380 Pregnancy offers an important phase, in which the health literacy level of pregnant women is  
47  
48 381 not only relevant for her own health but also for the (unborn) infant. This study is set up at the  
49  
50 382 very beginning of the pregnancy to explore the impact of health literacy on the health of both  
51  
52 383 mother and child. The GeMuKi project evaluates a low-threshold lifestyle intervention that is  
53  
54 384 accessible for all pregnant women as it is provided in the regular check-ups during pregnancy.  
55  
56 385 Previous research supports that low-threshold interventions are easy accessible for women  
57  
58 386 with both high and low health literacy levels and lead to successful implementation of an  
59  
60

1  
2  
3 387 intervention (39). The intervention consists of brief counselling sessions conducted by means  
4  
5 388 of MI, a technique with which healthcare providers can tailor the counselling to the health  
6  
7 389 literacy levels of pregnant women. MI techniques also allow participating women to  
8  
9  
10 390 participate actively in the counselling sessions, strengthening the autonomy, which is a skill  
11  
12 391 that positively affects health literacy (1) Research suggests that MI is effective in promoting  
13  
14 392 and positively changing health behaviour (40), which in turn results in better health outcomes  
15  
16 393 according to the model of Sorensen (1) To be health literacy sensitive, the intervention makes  
17  
18 394 use of digitalisation. Each counselling session is concluded with a SMART goal, defined by  
19  
20 395 both the healthcare provider and the woman and recorded in the counselling tool, which will  
21  
22 396 then be displayed in the GeMuKi-App of the pregnant woman. The App also provides further  
23  
24 397 information on topics that pregnant women might concern and are easily accessible. Using  
25  
26 398 digitalisation to promote health literacy has been part of other studies and is proven to be  
27  
28 399 effective (39). Briefly worded, the GeMuKi project focusses on the empowerment of  
29  
30  
31 400 participating women, which is a crucial health literacy skill (1) and is seen as an  
32  
33 401 empowerment tool for mothers (41). The empowerment is supported by active participation of  
34  
35 402 the women in the counselling and goal setting, which will strengthen the autonomy, support  
36  
37 403 behavior change and thus result in better health outcomes.  
38  
39  
40  
41  
42

43 404 An advantage of this study is that we will answer questions that arise with regards to health  
44  
45 405 literacy in pregnant women. Studies to date have measured health literacy in pregnant women,  
46  
47 406 however it was only one of many secondary outcome variables (17) (18). To better understand  
48  
49 407 the association between health literacy of pregnant women and (health) outcomes in both  
50  
51 408 mother and child, we utilize different data using questionnaires, data entry from the healthcare  
52  
53 409 provider and health insurance data of participants. Additionally, health literacy is measured  
54  
55 410 using different instruments. The HLS-EU-16 is tailored to the study participant's situation by  
56  
57 411 adding questions regarding pregnancy. The BHLS is used at the beginning and end of the  
58  
59  
60

1  
2  
3 412 pregnancy to assess for changes in the health literacy levels. Knowledge-based health literacy  
4  
5 413 questions were developed to assess objectively whether women understand health information  
6  
7  
8 414 on lifestyle during pregnancy and answer these questions correctly.  
9

10 415 However, some limitations have to be taken into consideration with regards to this study.  
11  
12 416 Associations between health literacy and other variables are examined within the GeMuKi  
13  
14  
15 417 project. Hence, we cannot conclude that the results can be generalised to other interventions.  
16  
17 418 Additionally, the implementation of the counselling is not monitored, which is why it is not  
18  
19 419 guaranteed that healthcare providers follow the principles of promoting health literacy and  
20  
21 420 implement what was taught in the training. With regards to the training it must be mentioned  
22  
23 421 that health literacy is a secondary outcome of the GeMuKi project, which is why health  
24  
25 422 literacy did not take as much time as lifestyle topics during the training. Even with the  
26  
27 423 inclusion of different health insurances, illiterate pregnant women might not be able to fill in  
28  
29 424 the baseline questionnaire and will be excluded from the study, which rules out an important  
30  
31 425 group that most likely requires health literacy strengthening. Even though the GeMuKi-App  
32  
33 426 was developed to be easily manageable, it cannot be guaranteed that this is sufficient for  
34  
35 427 women that have low digital health literacy skills. This might impact the handling of the App.  
36  
37 428 The App entails self-administered questionnaires, which are prone to overestimation, a further  
38  
39 429 limitation we have to take into account.  
40  
41  
42  
43  
44  
45

46 430 Results of this study can contribute to the better understanding of health literacy on various  
47  
48 431 outcomes and health services use, particularly during pregnancy. Study findings can provide  
49  
50 432 insights for researchers and policy makers, who want to develop and fund health literacy  
51  
52 433 sensitive interventions starting during pregnancy.  
53  
54  
55

56 434

57  
58  
59 435  
60

1  
2  
3 436 **Figures**  
4

5 437 Figure 1 Overview of counselling sessions and time points of data collection  
6

7 438 Figure 2 Mediation Model  
8  
9

10 439 **Author's contribution**  
11

12  
13 440 FN, AA and SS developed the study protocol. FK, LL, AS are members of the research team,  
14  
15 441 contributed to the design of the study, and provided continuous feedback. AMB is the  
16  
17 442 coordinator of the GeMuKi consortium, who also provided feedback. FN wrote the  
18  
19 443 manuscript. All authors provided comments and approved the final manuscript.  
20  
21  
22

23 444 **Funding**  
24

25 445 This study is funded by the Innovation Fund of the Federal Joint Committee (G-BA) from  
26  
27 446 10/2017 - 9/2021 in the section "New forms of care", module 3: Improving communication  
28  
29 447 with patients and promoting health literacy (Project no. 01NVF17014).  
30  
31  
32

33 448 **Competing interests**  
34

35 449 The authors declare that they have no competing interests.  
36  
37

38 450 **Acknowledgements**  
39

40 451 The authors would like to thank the GeMuKi consortium: Platform Nutrition and Physical  
41  
42 452 Activity (peb), Institute of Health Economics and Clinical Epidemiology, University Hospital  
43  
44 453 of Cologne (IGKE), Fraunhofer Institute for Open Communication Systems (FOKUS),  
45  
46 454 BARMER and Association of Statutory Health Insurance Physicians (KVBW). We would  
47  
48 455 like to acknowledge in particular Michael John and his team, who developed the telehealth  
49  
50 456 platform GeMuKi-Assist, used for data collection. We would also like to thank the health  
51  
52 457 insurances that provide health insurance claims data. Moreover, we would like to thank Isabel  
53  
54 458 Lück and Judith Kuchenbecker for the input in developing the knowledge-based health  
55  
56 459 literacy questions.  
57  
58  
59  
60

460

461 

## Reference

- 462 1. Sorensen K, Van den Broucke S, Fullam J, Doyle G, Pelikan J, Slonska Z, et al. Health literacy and public health: a systematic review and integration of definitions and models. *BMC public health*. 2012 Jan 25;12:80. PubMed PMID: 22276600. Pubmed Central PMCID: 3292515.
- 463 2. Berkman ND, Sheridan SL, Donahue KE, Halpern DJ, Crotty K. Low health literacy and health outcomes: an updated systematic review. *Annals of internal medicine*. 2011 Jul 19;155(2):97-107. PubMed PMID: 21768583.
- 464 3. Aaby A, Friis K, Christensen B, Rowlands G, Maindal HT. Health literacy is associated with health behaviour and self-reported health: A large population-based study in individuals with cardiovascular disease. *European journal of preventive cardiology*. 2017 Nov;24(17):1880-8. PubMed PMID: 28854822. Pubmed Central PMCID: 5680908.
- 465 4. Schaeffer D, Berens EM, Vogt D. Health Literacy in the German Population. *Deutsches Arzteblatt international*. 2017 Jan 27;114(4):53-60. PubMed PMID: 28211318. Pubmed Central PMCID: 5319379.
- 466 5. Schaeffer D, Hurrelmann K, Bauer U, Kolpatzik K, Gille S, Vogt D. [National Action Plan Health Literacy: Need, Objective and Content]. *Gesundheitswesen*. 2019 Jun;81(6):465-70. PubMed PMID: 30273942. Der Nationale Aktionsplan Gesundheitskompetenz - Notwendigkeit, Ziel und Inhalt.
- 467 6. Schaeffer D, Gille S, Hurrelmann K. Implementation of the National Action Plan Health Literacy in Germany-Lessons Learned. *International journal of environmental research and public health*. 2020 Jun 19;17(12). PubMed PMID: 32575425. Pubmed Central PMCID: 7345560.
- 468 7. Briscoe L, Lavender T, McGowan L. A concept analysis of women's vulnerability during pregnancy, birth and the postnatal period. *Journal of advanced nursing*. 2016 Oct;72(10):2330-45. PubMed PMID: 27255232.
- 469 8. Sayakhot P, Carolan-Olah M. Internet use by pregnant women seeking pregnancy-related information: a systematic review. *BMC pregnancy and childbirth*. 2016 Mar 28;16:65. PubMed PMID: 27021727. Pubmed Central PMCID: 4810511.
- 470 9. Smedberg J, Lupattelli A, Mardby AC, Nordeng H. Characteristics of women who continue smoking during pregnancy: a cross-sectional study of pregnant women and new mothers in 15 European countries. *BMC pregnancy and childbirth*. 2014 Jun 25;14:213. PubMed PMID: 24964728. Pubmed Central PMCID: 4080751.
- 471 10. Kaufman H, Skipper B, Small L, Terry T, McGrew M. Effect of literacy on breast-feeding outcomes. *Southern medical journal*. 2001 Mar;94(3):293-6. PubMed PMID: 11284516.
- 472 11. Lupattelli A, Picinardi M, Einarson A, Nordeng H. Health literacy and its association with perception of teratogenic risks and health behavior during pregnancy. *Patient education and counseling*. 2014 Aug;96(2):171-8. PubMed PMID: 24862909.
- 473 12. Poorman E, Gazmararian J, Elon L, Parker R. Is health literacy related to health behaviors and cell phone usage patterns among the text4baby target population? *Archives of public health = Archives belges de sante publique*. 2014;72(1):13. PubMed PMID: 24872883. Pubmed Central PMCID: 4036492.
- 474 13. Endres LK, Sharp LK, Haney E, Dooley SL. Health literacy and pregnancy preparedness in pregestational diabetes. *Diabetes care*. 2004 Feb;27(2):331-4. PubMed PMID: 14747209.
- 475 14. Pico C, Palou A. Perinatal programming of obesity: an introduction to the topic. *Frontiers in physiology*. 2013;4:255. PubMed PMID: 24062695. Pubmed Central PMCID: 3775463.
- 476 15. Freeman DJ. Effects of maternal obesity on fetal growth and body composition: implications for programming and future health. *Seminars in fetal & neonatal medicine*. 2010 Apr;15(2):113-8. PubMed PMID: 19853544.
- 477 16. Osborn CY, Paasche-Orlow MK, Bailey SC, Wolf MS. The mechanisms linking health literacy to behavior and health status. *American journal of health behavior*. 2011 Jan-Feb;35(1):118-28. PubMed PMID: 20950164. Pubmed Central PMCID: 3085858.

- 1  
2  
3 510 17. Nawabi F, Krebs F, Vennedey V, Shukri A, Lorenz L, Stock S. Health Literacy in Pregnant  
4 511 Women: A Systematic Review. *International journal of environmental research and public health*.  
5 512 2021 Apr 6;18(7). PubMed PMID: 33917631. Pubmed Central PMCID: 8038834.
- 6 513 18. Zibellini J, Muscat DM, Kizirian N, Gordon A. Effect of health literacy interventions on  
7 514 pregnancy outcomes: A systematic review. *Women and birth : journal of the Australian College of*  
8 515 *Midwives*. 2021 Mar;34(2):180-6. PubMed PMID: 32094036.
- 9 516 19. Curran GM, Bauer M, Mittman B, Pyne JM, Stetler C. Effectiveness-implementation hybrid  
10 517 designs: combining elements of clinical effectiveness and implementation research to enhance public  
11 518 health impact. *Medical care*. 2012 Mar;50(3):217-26. PubMed PMID: 22310560. Pubmed Central  
12 519 PMCID: 3731143.
- 13 520 20. Alayli A, Krebs F, Lorenz L, Nawabi F, Bau AM, Luck I, et al. Evaluation of a computer-assisted  
14 521 multi-professional intervention to address lifestyle-related risk factors for overweight and obesity in  
15 522 expecting mothers and their infants: protocol for an effectiveness-implementation hybrid study. *BMC*  
16 523 *public health*. 2020 Apr 15;20(1):482. PubMed PMID: 32293391. Pubmed Central PMCID: 7158079.
- 17 524 21. Hoffmann F, Koller D. [Different Regions, Differently Insured Populations? Socio-demographic  
18 525 and Health-related Differences Between Insurance Funds]. *Gesundheitswesen*. 2017 Jan;79(1):e1-e9.  
19 526 PubMed PMID: 26492391. Verschiedene Regionen, verschiedene Versichertenpopulationen?  
20 527 Soziodemografische und gesundheitsbezogene Unterschiede zwischen Krankenkassen.
- 21 528 22. RKI. Schwerpunktbericht der Gesundheitsberichterstattung des Bundes: Gesundheit von  
22 529 Kindern und Jugendlichen. Berlin: Robert Koch Institut, 2004.
- 23 530 23. Koletzko B, Cremer M, Flothkotter M, Graf C, Hauner H, Hellmers C, et al. Diet and Lifestyle  
24 531 Before and During Pregnancy - Practical Recommendations of the Germany-wide Healthy Start -  
25 532 Young Family Network. *Geburtshilfe und Frauenheilkunde*. 2018 Dec;78(12):1262-82. PubMed PMID:  
26 533 30655650. Pubmed Central PMCID: 6294644.
- 27 534 24. Miller WR, Rollnick S. Motivational interviewing: Helping people change, 3rd edition. 3 ed.  
28 535 New York: Guilford Press; 2013.
- 29 536 25. Barber MN, Staples M, Osborne RH, Clerehan R, Elder C, Buchbinder R. Up to a quarter of the  
30 537 Australian population may have suboptimal health literacy depending upon the measurement tool:  
31 538 results from a population-based survey. *Health promotion international*. 2009 Sep;24(3):252-61.  
32 539 PubMed PMID: 19531559.
- 33 540 26. Jordan S, Hoebel J. [Health literacy of adults in Germany: Findings from the German Health  
34 541 Update (GEDA) study]. *Bundesgesundheitsblatt, Gesundheitsforschung, Gesundheitsschutz*. 2015  
35 542 Sep;58(9):942-50. PubMed PMID: 26227894. Gesundheitskompetenz von Erwachsenen in  
36 543 Deutschland : Ergebnisse der Studie "Gesundheit in Deutschland aktuell" (GEDA).
- 37 544 27. Wallston KA, Cawthon C, McNaughton CD, Rothman RL, Osborn CY, Kripalani S. Psychometric  
38 545 properties of the brief health literacy screen in clinical practice. *Journal of general internal medicine*.  
39 546 2014 Jan;29(1):119-26. PubMed PMID: 23918160. Pubmed Central PMCID: 3889960.
- 40 547 28. Liu C, Wang D, Liu C, Jiang J, Wang X, Chen H, et al. What is the meaning of health literacy? A  
41 548 systematic review and qualitative synthesis. *Family medicine and community health*. 2020 May;8(2).  
42 549 PubMed PMID: 32414834. Pubmed Central PMCID: 7239702.
- 43 550 29. Rogozinska E, D'Amico MI, Khan KS, Cecatti JG, Teede H, Yeo S, et al. Development of  
44 551 composite outcomes for individual patient data (IPD) meta-analysis on the effects of diet and lifestyle  
45 552 in pregnancy: a Delphi survey. *BJOG : an international journal of obstetrics and gynaecology*. 2016  
46 553 Jan;123(2):190-8. PubMed PMID: 26841002.
- 47 554 30. Tosun OC, Solmaz U, Ekin A, Tosun G, Mutlu EK, Okyay E, et al. The Turkish version of the  
48 555 pregnancy physical activity questionnaire: cross-cultural adaptation, reliability, and validity. *Journal*  
49 556 *of physical therapy science*. 2015 Oct;27(10):3215-21. PubMed PMID: 26644678. Pubmed Central  
50 557 PMCID: 4668169.
- 51 558 31. Kazemi A, Hajian S, Sharifi N. The Psychometric Properties of the Persian Version of the  
52 559 Pregnancy Physical Activity Questionnaire. *International Journal of Women's Health and*  
53 560 *Reproduction Sciences*. 2019;7(1):54-60.



- 1  
2  
3 561 32. Haftenberger M, Heuer T, Heidemann C, Kube F, Krems C, Mensink GB. Relative validation of  
4 562 a food frequency questionnaire for national health and nutrition monitoring. *Nutrition journal*. 2010  
5 563 Sep 14;9:36. PubMed PMID: 20840739. Pubmed Central PMCID: 2945984.  
6 564 33. Koch-Institut R. Studie zur Gesundheit von Kindern und Jugendlichen. Elternfragebogen 669  
7 565 0-2. Berlin: 2003.  
8 566 34. NAM. In: Rasmussen KM, Yaktine AL, editors. *Weight Gain During Pregnancy: Reexamining*  
9 567 *the Guidelines*. The National Academies Collection: Reports funded by National Institutes of Health.  
10 568 Washington (DC)2009.  
11 569 35. LifeCycle Project-Maternal O, Childhood Outcomes Study G, Voerman E, Santos S, Inskip H,  
12 570 Amiano P, et al. Association of Gestational Weight Gain With Adverse Maternal and Infant Outcomes.  
13 571 *Jama*. 2019 May 7;321(17):1702-15. PubMed PMID: 31063572. Pubmed Central PMCID: 6506886.  
14 572 36. Neubauer S, Zeidler J, Graf von der Schulenburg JM. Grundlagen und Methoden von GKV-  
15 573 Routinedatenstudien. Leibniz Universität Hannover, Center for Health Economics Research Hannover  
16 574 (CHERH), 2014 Contract No.: 534.  
17 575 37. In: Nielsen-Bohlman L, Panzer AM, Kindig DA, editors. *Health Literacy: A Prescription to End*  
18 576 *Confusion*. Washington (DC)2004.  
19 577 38. Barnes LAJ, Barclay L, McCaffery K, Aslani P. Women's health literacy and the complex  
20 578 decision-making process to use complementary medicine products in pregnancy and lactation.  
21 579 *Health expectations : an international journal of public participation in health care and health policy*.  
22 580 2019 Oct;22(5):1013-27. PubMed PMID: 31116500. Pubmed Central PMCID: 6803395.  
23 581 39. Lanpher MG, Askew S, Bennett GG. Health Literacy and Weight Change in a Digital Health  
24 582 Intervention for Women: A Randomized Controlled Trial in Primary Care Practice. *Journal of health*  
25 583 *communication*. 2016;21 Suppl 1:34-42. PubMed PMID: 27043756. Pubmed Central PMCID: 4935541.  
26 584 40. Morton K, Beauchamp M, Prothero A, Joyce L, Saunders L, Spencer-Bowdage S, et al. The  
27 585 effectiveness of motivational interviewing for health behaviour change in primary care settings: a  
28 586 systematic review. *Health psychology review*. 2015;9(2):205-23. PubMed PMID: 26209209.  
29 587 41. Porr C, Drummond J, Richter S. Health literacy as an empowerment tool for low-income  
30 588 mothers. *Family & community health*. 2006 Oct-Dec;29(4):328-35. PubMed PMID: 16980808.

35 589

37 590

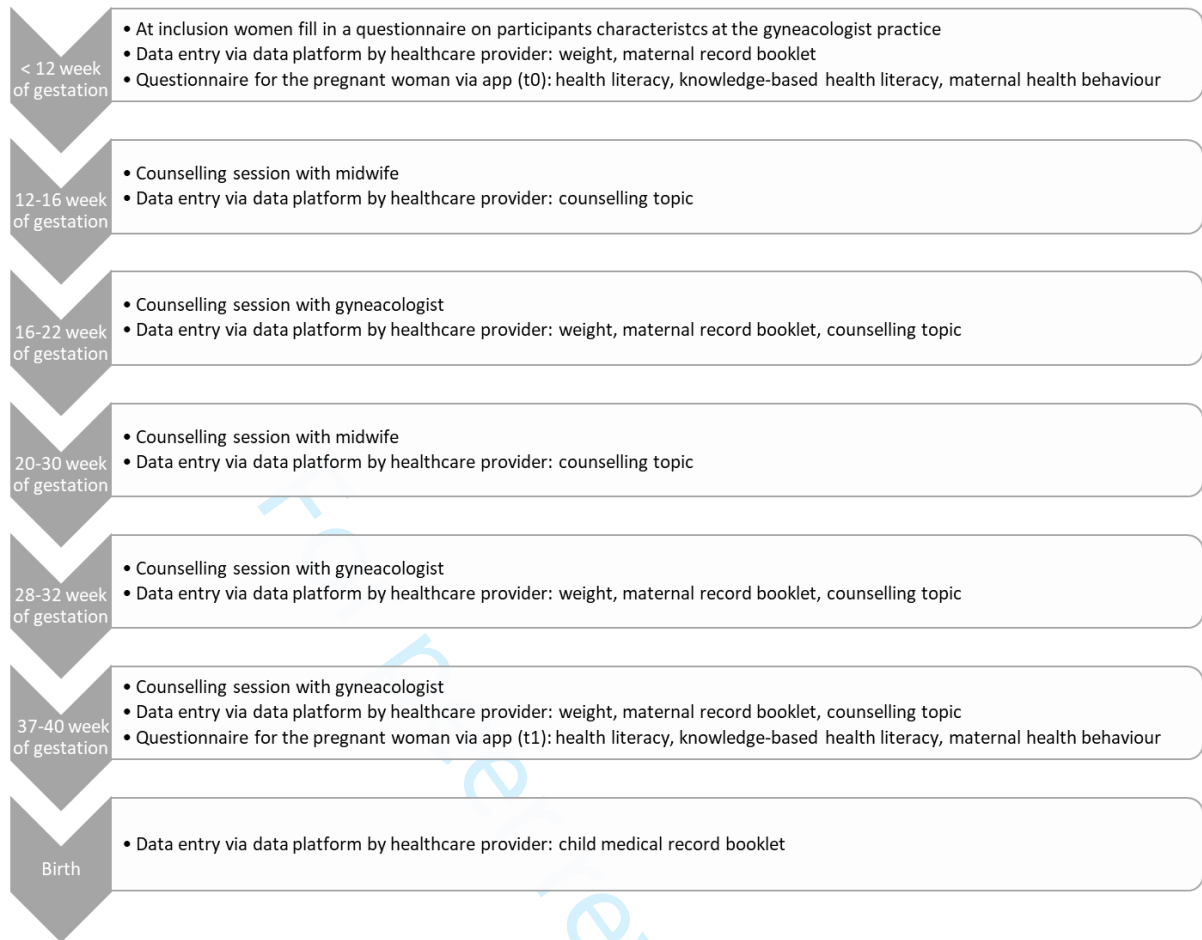

Figure 1 Overview of counselling sessions and time points of data collection

1  
2  
3  
4  
5  
6  
7  
8  
9  
10  
11  
12  
13  
14  
15  
16  
17  
18  
19  
20  
21  
22  
23  
24  
25  
26  
27  
28  
29  
30  
31  
32  
33  
34  
35  
36  
37  
38  
39  
40  
41  
42  
43  
44  
45  
46  
47  
48  
49  
50  
51  
52  
53  
54  
55  
56  
57  
58  
59  
60



Figure 2 Mediation Model

For peer review only
